# Supplementary material for: Ribosomopathy-like properties of murine and human cancers
Source: PubMed Central journal article supplement (PMC5562309; doi:10.1371/journal.pone.0182705), 2017-08-18
Supplement: pone.0182705.s001.pdf [file pone.0182705.s001.pdf]

# **S1 File: Supporting Information**

## **Ribosomopathy-like Properties of Murine and Human Cancers**

Sucheta Kulkarni<sup>1,a</sup>, James M. Dolezal<sup>1,a</sup>, Huabo Wang<sup>1</sup>, Laura Jackson<sup>2</sup>, Jie Lu<sup>1</sup>, Brian P. Frodey<sup>1</sup>, Atinuke Dosunmu-Ogunbi<sup>1</sup>, Youjun Li<sup>3</sup>, Marc Fromherz<sup>1</sup>, Audry Kang<sup>1,a</sup>, Lucas Santana-Santos<sup>4</sup>, Panayiotis V. Benos<sup>4,5</sup> and Edward V. Prochownik<sup>1,6,7</sup>.

## **Materials and methods**

### **Selecting murine ribosomal proteins**

The Mouse Genomics Informatics (MGI) website (<http://www.informatics.jax.org>) was queried for genes of type “protein coding gene” containing the name “ribosomal protein” without the strings “mitochondrial,” “kinase,” or “modification.” Ninety genes were identified, but two (*Rpl32l* and *Rpl6l*) were not found in the RNA-seq cufflinks output for the hepatoblastoma analysis. Three additional genes (*Rpl10l*, *Rpl39l*, *Rpl3l*) were excluded from the HB analysis due to insufficient counts, resulting in a list of 85 mouse cytoplasmic ribosomal proteins. A total of 82 cytoplasmic RP genes were included in the HCC analysis, as eight of the 90 total cytoplasmic RP genes possessed insufficient counts in the RNA-seq output.

### **Accessing TCGA RNA-seq and clinical data**

TCGA data was accessed through the University of California Santa Cruz Cancer Browser (<https://genome-cancer.ucscu.edu/proj/site/hgHeatmap/>), downloading data listed under “gene expression (IlluminaHiSeq)” for each tumor type. Matched normal tissues for each cancer were identified by the following: 1) possessing at least two samples in the downloaded database,

one identified as “primary tumor” and one identified as “solid tissue normal” in the column “sample type”, and 2) presence of RNA-seq data for both samples. A list of 80 human ribosomal proteins was assembled from the University of Miyazaki’s Ribosomal Protein Gene Database (<http://ribosome.med.miyazaki-u.ac.jp>). When queried, three of these gene transcripts (*RPL40*, *RPS30*, and *RPS4Y*) were not found in the genomic data, so the final list used for the following analysis consisted of 77 RP genes. TCGA expression data, which is stored log-transformed, was base-two exponentiated for all samples.

### **TCGA: survival curves**

To determine if RP transcript deregulation correlated with survival, this information was combined with clinical data from TCGA regarding days to death or last follow-up. Tumor samples meeting the following criteria were excluded from the survival analysis: 1) samples without corresponding clinical information, 2) samples with no recorded “days to death” or “days to last follow up”, or 3) days to death or last follow-up less than or equal to zero. There were 357 tumor samples in the HCC cohort with corresponding clinical information, 25 of which were excluded from the survival analysis on these criteria. The CRC cohort contained 278 tumor samples with clinical information and 4 were excluded. The BC cohort contained 1082 tumors with clinical information, 18 of which were excluded. Survival analysis was not performed for the PC cohort, as the requisite clinical information was available for only 6 patients. Tumor samples were then sorted according to the severity of RP transcript deregulation and placed into the upper and lower quartiles. There were 83 tumors per quartile in the HCC cohort, 69 tumors per quartile in the CRC cohort, and 266 tumors per quartile in the BC cohort. Five-year survival curves were generated comparing the top and bottom quartiles in each cohort, with significance

determined by a Log-rank test P-value  $< 0.05$ . Survival differences were significant in HCC (P = 0.0435) and BC (P = 0.0046).

### **TCGA: mutation analysis**

TCGA mutation information was accessed using cBioPortal (<http://www.cbioportal.org/>), from the “TCGA, Provisional” data for each cancer type. Each data set was queried for RP coding mutations in any tumor sample. A literature search was performed in order to classify these observed mutations into three general categories: mutations in RPs previously implicated in a ribosomopathy, mutations identical to those previously identified in a ribosomopathy, and all other mutations. The literature search included the LOVD Diamond-Blackfan Anemia database (<http://dbagenes.unito.it/home.php>) as well as PubMed searches of each individual ribosomal protein gene identifier.

### **Quantification of rRNA processing**

Total RNAs were purified using RNeasy columns (Qiagen, Inc. Valencia, CA) and then digested with TURBO-DNA *free* DNase as recommended by the supplier (Thermo-Fisher, Pittsburgh, PA). RNA concentrations were determined with a Nanodrop ND-1000 instrument (NanoDrop Technologies Inc., Wilmington, DE, USA) and RNA integrity was evaluated with an Agilent 2100 Bioanalyzer (Agilent Technologies, Santa Clara, CA). RNA integrity number (RIN) values for all samples in the HCC mouse model and HB tumors  $>9$  and those for HB control livers were  $>7.5$ .

To assess rRNA processing intermediates, we quantified 18S-ITS1, ITS1-5.8S, 5.8S-ITS2 and ITS2-18S junctions as depicted in Fig 2A using a Power SYBR® Green RNA-to-CT™ 1-Step Kit (Thermo-Fisher) on a StepOnePlus™ Real-Time PCR System (Thermo-Fisher). PCR primers (IDT, Inc., Coralville, IA) were selected from the murine 47S rRNA Gen Bank sequence BK000964.3 and comprised the following sequences:

18S-ITS1 (Fwd): 5'-AAGACGGTCGAACTTGACTATCTAG-3' (nt 5797)

(54): 5'-GCCGCCGCTCCTCCACAGTCTC-3' (nt 5900)

ITS1-5.8S (Fwd): 5'-CCCGTGAGTTCGCTCACACCCGA-3' (nt 6844)

(54): 5'-CGCAGCTAGCTGCGTTCTTCATCGA-3' (nt 6934)

5.8S-ITS2 (Fwd): 5'-TTGATCATCGACACTTCGAACGCAC-3' (nt 6961)

(54): 5'-CGCAGCGGGTGACGCGATTGAT-3' (nt 7059)

ITS2-28S (Fwd): 5'-CCTGAGACGGTTCGCCGGCTCGT-3' (nt 8012)

(54): 5'-AGCGGGTCGCCACGTCTGATCTGA-3' (nt 8153)

For each set of PCR primers, reactions were performed in triplicate on 5-8 liver or tumor samples. The results of each set of reactions were normalized to total 18S and 28S rRNA content, which were also obtained from triplicate reactions run in parallel. Control primers consisted of the following sets of oligonucleotides:

18S (Fwd): 5'-CTGAGAAACGGCTACCACATC-3' (nt 4450)

(54): 5'-GCCTCGAAAGAGTCCTGTATTG-3' (nt 4556)

28S (Fwd): 5'-GTAAACGGCGGGAGTAACTATG-3' (nt 11522)

(54): 5'-GACAGTGGGAATCTCGTTCATC-3' (nt 11619)

Each reaction (20  $\mu$ L in a 96-well fast plate) consisted of 10 ng of RNA template, 0.16  $\mu$ L RT Enzyme Mix, 10  $\mu$ L the above-described RT-PCR Mix, 3.84  $\mu$ L nuclease-free water and 1  $\mu$ L of primer solution containing both forward and reverse primers at a concentration of 100 ng/ $\mu$ L each. Run conditions for RT-PCR reactions consisted of a 48°C hold for 30 minutes to catalyze reverse transcription followed by a 10-minute hold at 95°C. PCR conditions comprised 40 cycles of a 1 min 95°C melting period followed by a 1-minute 65°C annealing and extension period. Each sample was assayed in triplicate with variances seldom exceeding 5%. P-values were determined using Welch's t-test.

### **Tissue fractionation immuno-precipitation and immuno-fluorescent staining**

All buffers were supplemented with standard protease and phosphatase inhibitors. Tissue was first washed with ice-cold PBS, minced into small pieces and then homogenized in cytoplasmic extraction buffer (200-250 mg tissue/2 ml of buffer). Cell breakage was monitored under a microscope. Homogenates were centrifuged at 500x g for 5 min at 4<sup>0</sup>C and the resultant supernatants were used as the cytoplasmic fraction. Pellets were further subjected to membrane extraction buffer followed by centrifugation at 3000x g for 5 min at 4<sup>0</sup>C to pellet nuclei. Nuclear pellets were divided into two halves. One half was used to solubilize nuclei and release chromatin-bound proteins by extracting with nuclear extraction buffer containing 5 mM CaCl<sub>2</sub>. The other half was processed to isolate nucleoli as described (<http://www.lamondlab.com>). For this step, nuclear pellets were re-suspended in a buffer containing 10 mM Hepes, pH 7.9; 0.35 M sucrose and 0.5 mM MgCl<sub>2</sub> and sonicated on ice for 6 x 10 sec bursts with 10 sec cooling intervals. Sonicated lysates were layered over a buffer containing 10 mM Hepes, pH 7.9; 0.88 M sucrose and 0.5 mM MgCl<sub>2</sub> and centrifuged at 3000x g for 10 min at 4<sup>0</sup>C. Nucleolar pellets thus

obtained were solubilized in a buffer containing Tris HCl, pH 8.0; 20 mM NaCl; 1 mM EDTA; 0.5% NP40 and 25 mM NaF. Fractions were analyzed by immuno-blotting for GAPDH (cytoplasmic marker), histone H3 (nuclear marker), fibrillarin (nuclear and nucleolar marker). Expression of p53, Mdm2, and p19<sup>ARF</sup> was assessed by immuno-blotting across each of the fractions following SDS-PAGE.

For immuno-precipitations, freshly isolated cytoplasmic liver and tumor fractions were diluted to a final protein concentration of 3 mg/ml in “IP buffer” containing Tris HCl, pH 8.0; 20 mM NaCl; 1 mM EDTA; 0.5% NP40 and 25 mM NaF supplemented with protease and phosphatase inhibitors and subjected to two rounds of pre-clearing. The first round consisted of rocking 1 ml of lysate with 20  $\mu$ l Protein G PLUS-agarose beads (Santa Cruz Biotechnology) for 1 h at 4<sup>0</sup>C followed by centrifugation at 4000 rpm, 4<sup>0</sup>C for 5 min, to remove agarose beads. The second round of clearing was performed following the addition of 20  $\mu$ l of isotype specific IgG1-agarose conjugate (LifeSpan BioSciences inc., Seattle, WA) to the pre-cleared lysate for 1 h at 4<sup>0</sup>C. Upon a brief centrifugation to again remove the agarose-conjugate, the fractions were equally divided. One portion was incubated with 20  $\mu$ l mouse IgG1-agarose conjugated beads while the other part was incubated with Mdm2 antibody agarose-conjugated beads (Santa Cruz Biotechnology) overnight at 4<sup>0</sup>C with gentle shaking. Beads were washed four times for 1 h each time at 4<sup>0</sup>C with IP buffer to remove any unbound protein, followed by re-suspension in SDS sample buffer and denaturation at 95<sup>0</sup>C for 4 min. Immunoprecipitates were further analyzed by gel electrophoresis and silver staining.

Immunofluorescent staining (Fig. 5C) was performed on liver and tumor frozen sections. Fresh tissues were first fixed in PBS-4% paraformaldehyde for 2-4 followed by an overnight incubation in PBS-40% sucrose at 4<sup>0</sup>C. The fixed tissues were then embedded in Tissue Plus

O.C.T. Compound (SciGen Scientific, Gardenas, CA), frozen on dry ice and stored at  $-80^{\circ}\text{C}$ . Frozen tissues were cryo-sectioned, stained with antibodies against Mdm2 or p53 (Table S1) and counterstained with 4,6-Diamidino-2-phenylindole, dihydrochloride (DAPI) ( $1\ \mu\text{g}/\text{ml}$ ) for 5 min. Images were obtained on an Olympus Fluoview FV1000 confocal microscope. The nuclear: cytoplasmic distribution of Mdm2 and p53 were determined and quantified using the Particle Analysis program of Image J software (<https://imagej.nih.gov/ij/>).

## **Mass spectrometry**

Briefly, excised gel bands were washed with HPLC water and de-stained exhaustively with 50% acetonitrile (ACN)/25 mM ammonium bicarbonate. Gel pieces were dehydrated with 100% ACN, reduced with 10 mM dithiothreitol (DTT) at  $56^{\circ}\text{C}$  for 1 hour, followed by alkylation with 55 mM iodoacetamide (IAA) at room temperature for 45 min in the dark. Gel pieces were then again dehydrated with 100% ACN to remove excess DTT and IAA, and rehydrated with 20  $\text{ng}/\mu\text{l}$  trypsin/25 mM ammonium bicarbonate and digested overnight at  $37^{\circ}\text{C}$ . The resultant tryptic peptides were extracted with 70% ACN/5% formic acid, vacuum dried and re-constituted in 18  $\mu\text{l}$  0.1% formic acid.

Proteolytic peptides were analyzed by a nanoflow reverse-phased liquid chromatography tandem mass spectrometry (LC-MS/MS). They were loaded onto a C18 PicoChip<sup>TM</sup> column packed with 10.5 cm of Repronil C18 3  $\mu\text{m}$  120 $\text{\AA}$  chromatography media with a 75  $\mu\text{m}$  ID column and a 15  $\mu\text{m}$  tip (New Objective, Inc., Woburn, MA) using a Dionex HPLC system (Dionex Ultimate 3000, ThermoFisher Scientific, San Jose, CA) operated with a double-split system (Dr. Steven Gygi from Department of Cell Biology, Harvard Medical School, personal communication) to provide an in-column nano-flow rate ( $\sim 300\ \text{nl}/\text{min}$ ). Mobile phases used were

0.1% formic acid for A and 0.1% formic acid in acetonitrile for B. Peptides were eluted off the column using a 52 min gradient (2-40% B in 42 min, 40-95% B in 1min, 95% B for 1 min, 2% B for 8 min) and injected into a linear ion trap MS (LTQ-XL, ThermoFisher Scientific) through electrospray.

The MS instrument was operated in a data-dependent MS/MS mode in which each full MS spectrum was followed by MS/MS scans of the 5 most abundant molecular ions determined from full MS scan (acquired based on the setting of 1000 signal threshold, 10000 AGC target, 100 ms maximum accumulation time, 2.0 Da isolation width, 30 ms activation time and 35% normalized collision energy). Dynamic exclusion was enabled to minimize redundant selection of peptides previously selected for CID.

MS/MS spectra were searched using MASCOT search engine (Version 2.4.0, Matrix Science Ltd, London, UK) against the UniProt mouse proteome database. The following modifications were used: static modification of cysteine (carboxyamidomethylation, +57.05 Da), variable modification of methionine (oxidation, +15.99 Da). The mass tolerance was set at 1.4 Da for the precursor ions and 0.8 Da for the fragment ions. Peptide identifications were filtered using PeptideProphet™ and ProteinProphet® algorithms (LabKey, Inc. Seattle, WA) with a protein threshold cutoff of 99% and peptide threshold cutoff of 90% implemented in Scaffold™ (Proteome Software, Portland, Oregon, USA).



# Figures

## Figure A

### A

#### Relative Percent Expression of RP Transcripts: WT Hepatocytes vs. HBs

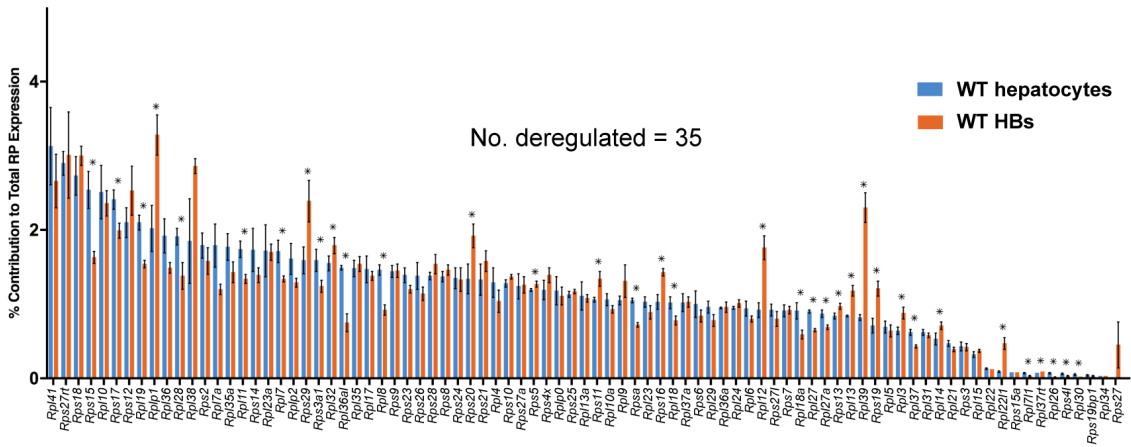

### B

#### Relative Percent Expression of RP Transcripts: KO Hepatocytes vs. HBs

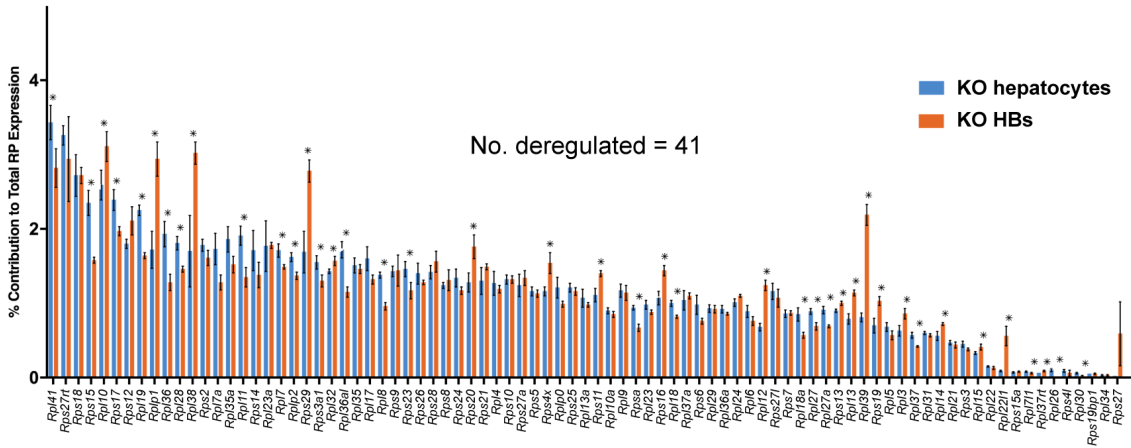

**Figure B**

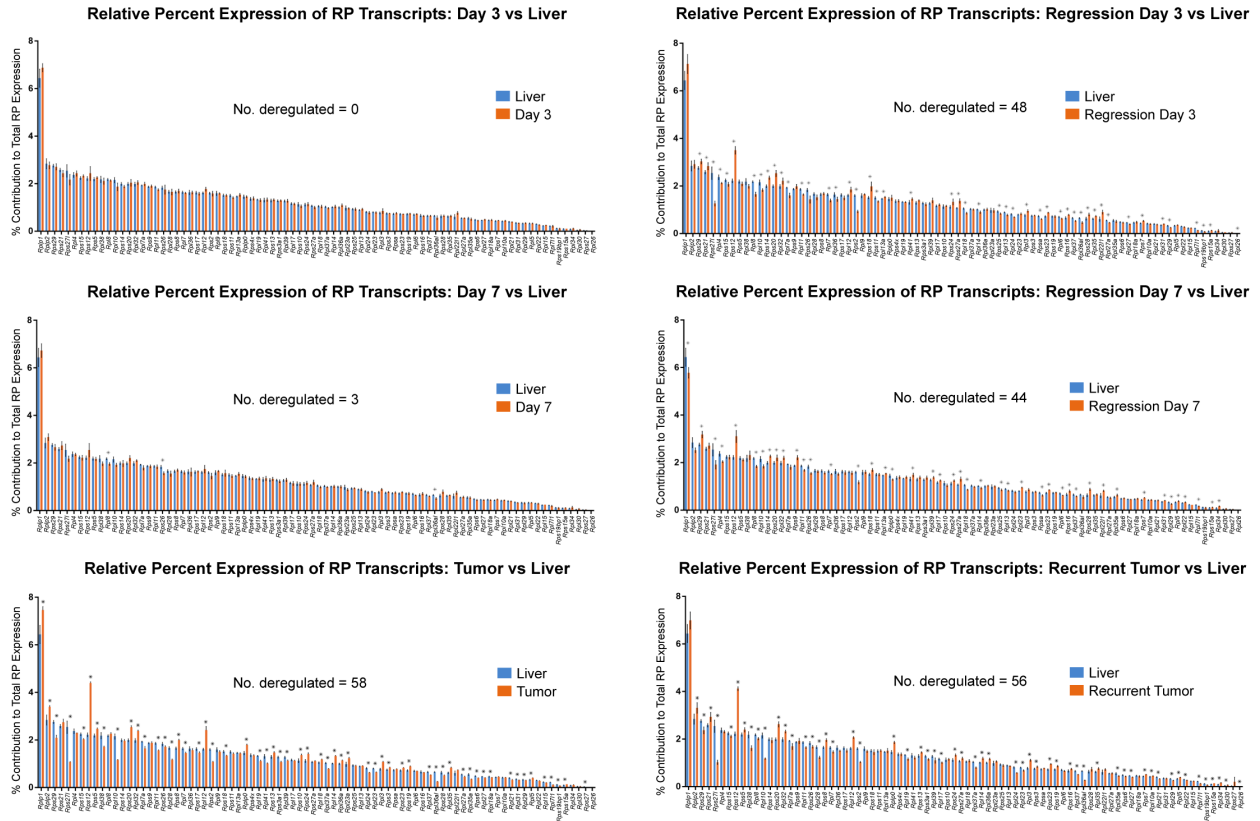

Figure C

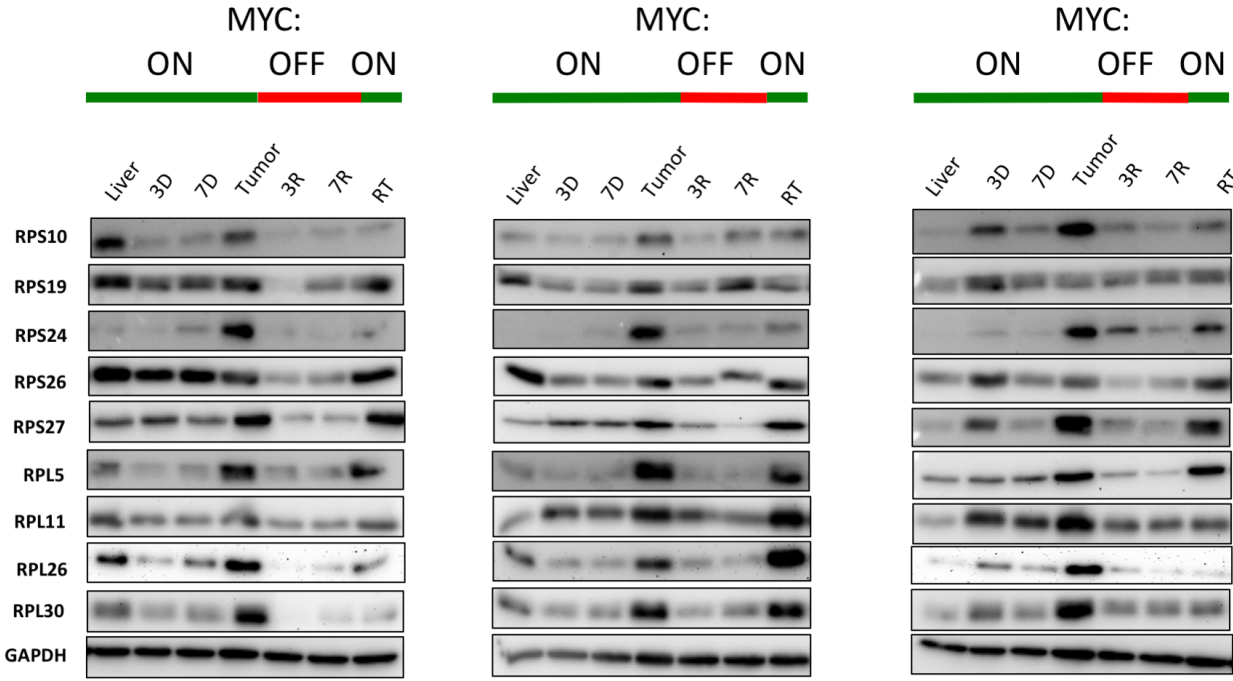

**Figure D**

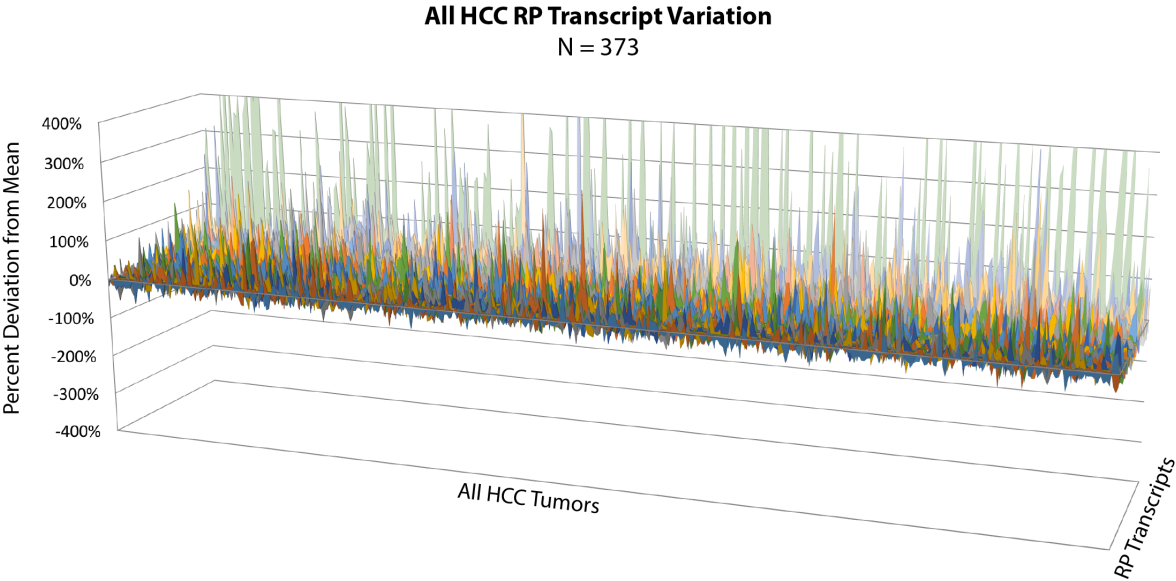

**Figure E**

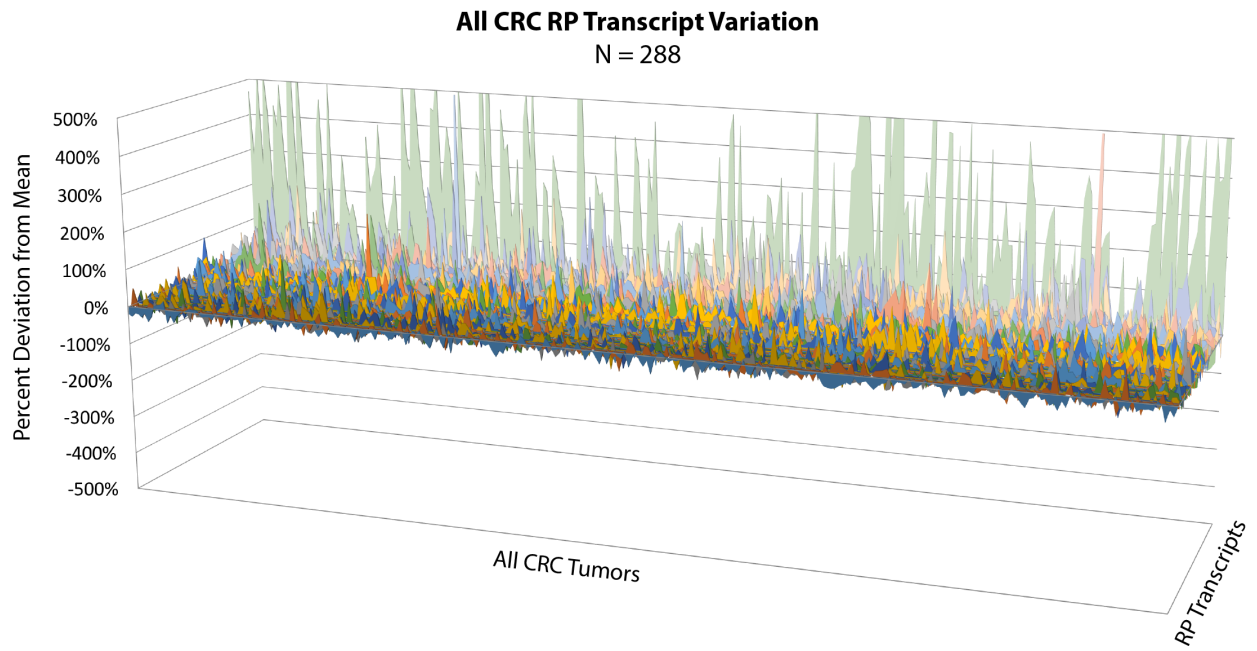

**Figure F**

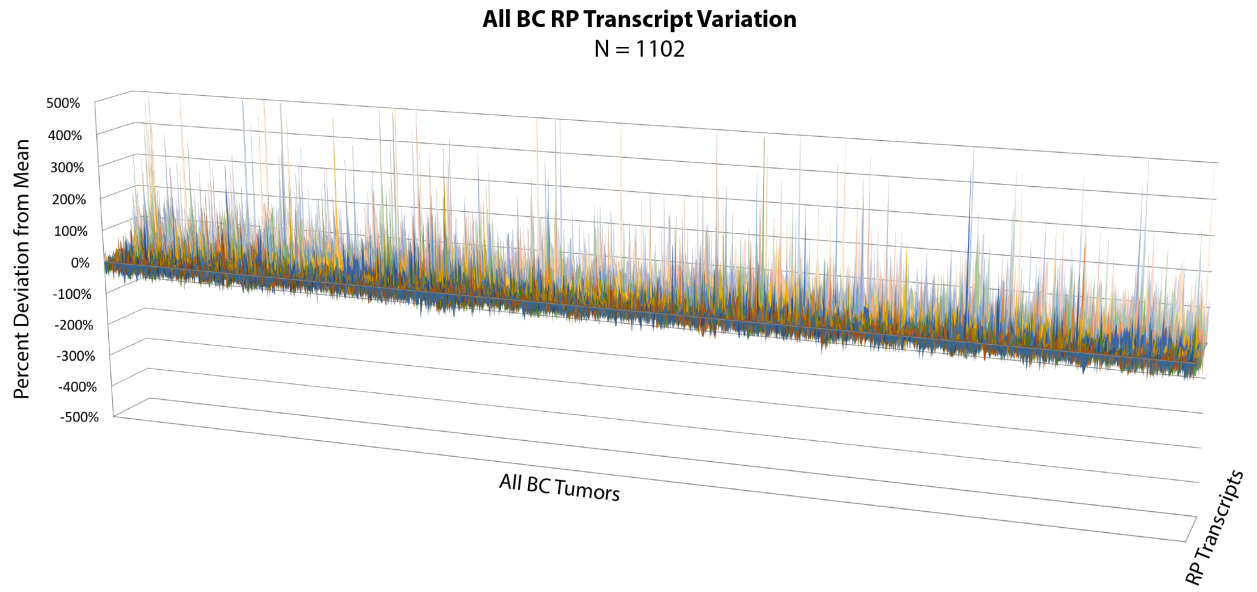

**Figure G**

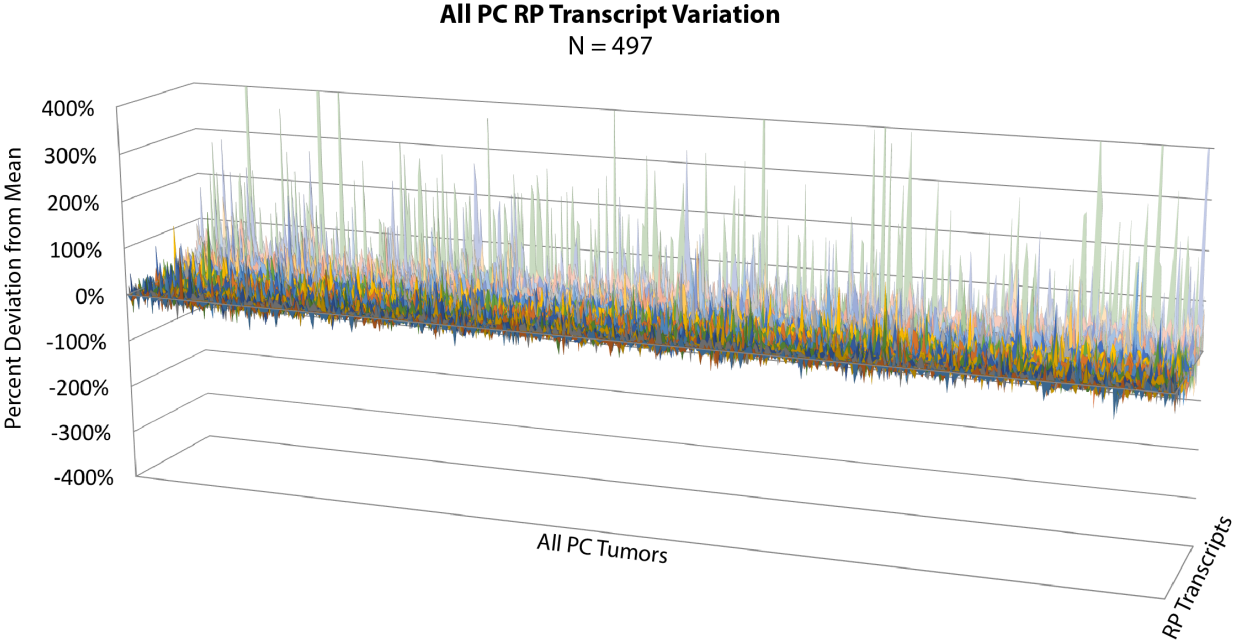

Figure H

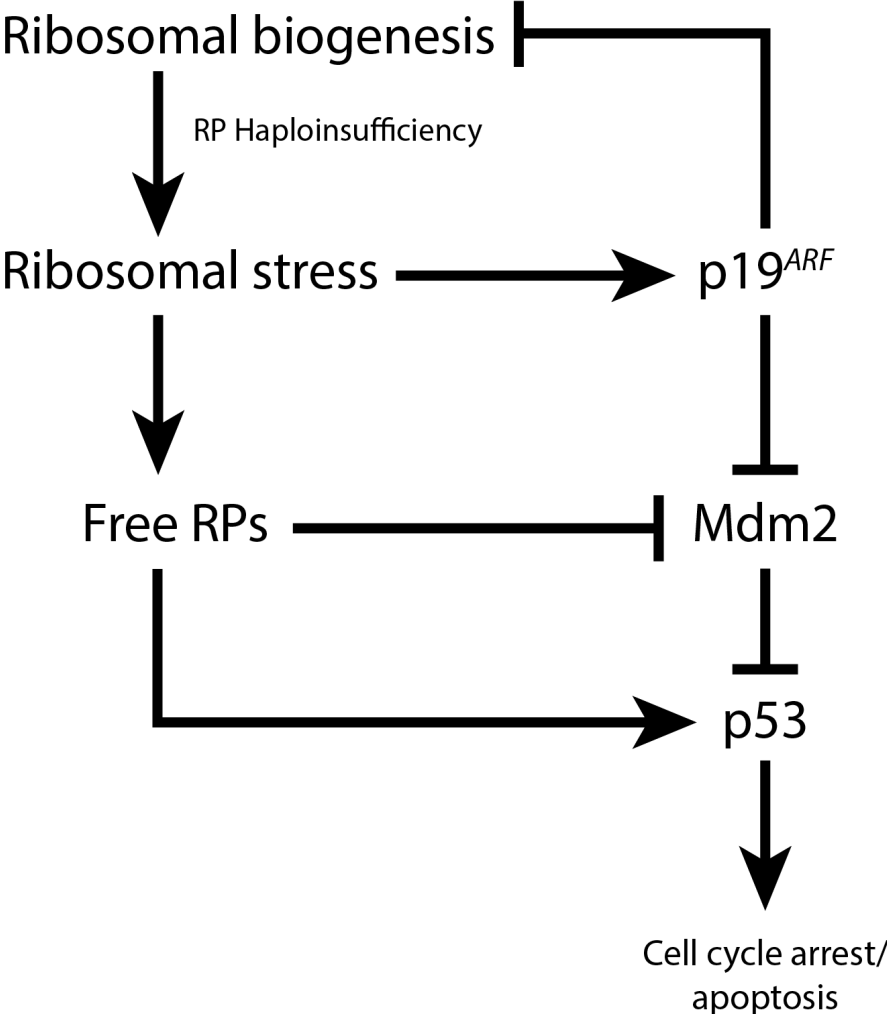



**Figure I**

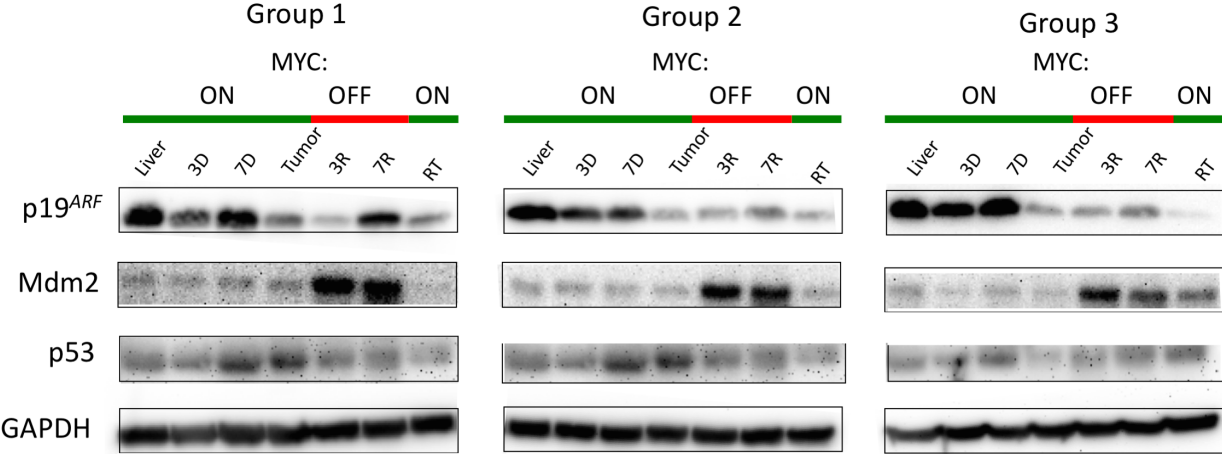

**Figure J**

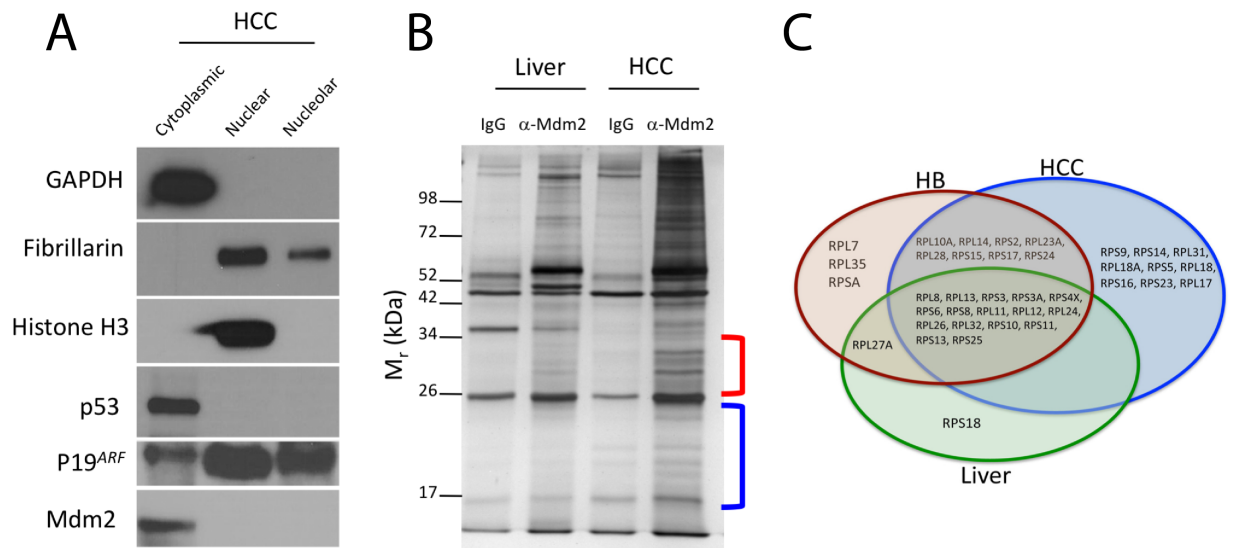

# Figure K

1. P62908 (100%), 26,674.5 Da  
R33\_MOUSE 40S ribosomal protein S3 OS=Mus musculus GN=Rps3 PE=1 SV=1  
14 exclusive unique peptides, 15 exclusive unique spectra, 46 total spectra, 156/243 amino acids (64% coverage)  
MAVOISKKR K FVADGIFKAE LNEFFLTRELA EDGYSQVEVR VTPTRTEIIL  
LATRIONVILG EKRRIRELT AVVQKRFQFP EGSVELYAEK VATRGLCAIA  
DAEALRYKLL CGLAVRRACY GVLRFIMESF AKGCENVVSQ KLRGORAASM  
KFDGDMIL CDPVNYVVDI AVRHFIMROG VLGKVKIML PWDPSGKIGP  
KKPLPDHVS I VEPKDEILPT TPISEQKGGK PEPPAMPQPV PTA
2. P62702 (100%), 29,599.3 Da  
R54X\_MOUSE 40S ribosomal protein S4, X isoform OS=Mus musculus GN=Rps4x PE=2 SV=2  
10 exclusive unique peptides, 11 exclusive unique spectra, 35 total spectra, 112/263 amino acids (43% coverage)  
MARCPKHLK RVAAPKHWML DKLTGVFAPR PSTGPHKLR CLPLIIFLRN  
RLK YALTGDE VKKICMORFI KIDGKVRTDI TYPAGFMDVI SIDKTGFNR  
LIYDTKGRFA VHRITPEEAK YKLCVKRKIF VGTGKIPHLV THDARTIRYP  
DPLTKVNDTI DIDLETGKIT DFKFDGTGL CMVTGGANLG RIGVITNRR  
HFGSEDDVYH K DANGMSFAT RLSNIFVIGK GNKPWISLPR GKGIRLTIAE  
ERDKRLAAKQ SSG
3. P47963 (100%), 24,306.4 Da  
RL13\_MOUSE 60S ribosomal protein L13 OS=Mus musculus GN=Rpl13 PE=2 SV=3  
6 exclusive unique peptides, 7 exclusive unique spectra, 19 total spectra, 62/211 amino acids (29% coverage)  
MAPSRNMGIL KPHFHKDWOO RVDTFWENOPA RKIRRRKARO AKARRIAPRP  
ASGPIRPIVR CPTVRYHTKV RAGRQFSLEE LRVAGIHKKV ARTIGISVDP  
RRRNKSTESL QANVORLKEY RSKLILFPRK PSAPKKGDS AELKLATOL  
TGVMPTRNV YKKEKARVIT EEEKNFKAFA SLRMRANAR LFGIRAKRAK  
EAAEQDVEKK K
4. P62242 (100%), 24,206.4 Da  
R58\_MOUSE 40S ribosomal protein S8 OS=Mus musculus GN=Rps8 PE=2 SV=2  
5 exclusive unique peptides, 7 exclusive unique spectra, 23 total spectra, 60/208 amino acids (29% coverage)  
MGISRDNWHK RRKTGGKRP YHKRRKYELG RPAANTKIGP RRIHTVVRVG  
GNKKYRARI DVGNSWGE CTRKTRIID VVYNASNNEI VRTKTLVKN  
IVLIDSTPYR OWYESHYALP LGRKKGAKLT PEEELIENKK RSKKIOKKYD  
ERKKNAKISS LLEEQFQGGK LLACIASRPG QCGRADGYVL EGRELEKRYL  
KIKARFKGK
5. P25444 (100%), 31,232.2 Da  
R52\_MOUSE 40S ribosomal protein S2 OS=Mus musculus GN=Rps2 PE=2 SV=3  
7 exclusive unique peptides, 8 exclusive unique spectra, 24 total spectra, 77/293 amino acids (26% coverage)  
MADDAGAAGC PGGPGGPGLG GRGCFRGGFG SGLRGRGRGR GRGRGRGGA  
RGGKAEDKEW IPVTKLGRV KDMKIKSLEE IYLFSLPIKE SEIIDFFLGA  
SLKDEVLKIM PVOKOTRAGO RTRFKAFVAI GDYNGHVGLG VKCSKEVATA  
IRGAILLAKL SIVPRRCYWG GKIIGPHTV PCKVTGRGGS VLVRIPAPR  
GTGIVSAPVP KLLMAGTGT DQYTSARGCT ATLGNFAKAT FQALSKTYSV  
LTPDLWKTETV FTKSPYQEFIT DHLVKTHTRV SVQRTQAPAV ATT
6. P62918 (100%), 28,024.8 Da  
RL8\_MOUSE 60S ribosomal protein L8 OS=Mus musculus GN=Rpl8 PE=2 SV=2  
4 exclusive unique peptides, 4 exclusive unique spectra, 9 total spectra, 64/257 amino acids (25% coverage)  
MGRVIRGORK GAGSVFRAHV KHRKGAARLR AVDFEAERHGY IKGLVKDILH  
DPRGRAPLAK VVFRDPYREK KRTELFIAAE GIHTGOFVYC GKKAOLNIGN  
VLPVGTMEG TIVCCLEEKP GDRKLARAS GNYATVISHN PETKTRVVKL  
PSGSKKVISS ANRAVGGVVA GGRIDRPIL KAGRAYHKYK AKRNCWPRVR  
GVAMNPFVHP FGGNHQHTG KPSTIRRDAP AGRKVGLIAA RRTGLRGTG  
TVQEKEN
7. D326C3 (100%), 29,825.2 Da  
D326C3\_MOUSE 40S ribosomal protein S3a OS=Mus musculus GN=Rps3a2 PE=3 SV=1  
6 exclusive unique peptides, 7 exclusive unique spectra, 21 total spectra, 62/264 amino acids (23% coverage)  
MAVGKNNRLL KGGKKGAKKK VVDPFSKKDW YDVKAPAMFN IRNIGKTLVLT  
RTOGKIASD GLKGRVFEVS LADLONDEVA FRKFKLITED VOGNCLTNF  
HGMDLTRDKM CSMVKWQTM IEAHYDVRTT DGYELRLFCV GFTKRRNNOI  
RSTSYAQHQD VROIRKMMME IMTRVQTHD KKEVVKLIPI DYSIAGDIEKA  
COSIYPLHDV FVRKVKMLKK PKSELGLKME LHGEGGSSG AAGDETGAKV  
ERADGYEPPV QESV
8. P62754 (100%), 28,681.7 Da  
R56\_MOUSE 40S ribosomal protein S6 OS=Mus musculus GN=Rps6 PE=1 SV=1  
4 exclusive unique peptides, 5 exclusive unique spectra, 11 total spectra, 49/249 amino acids (20% coverage)  
MKLNISFPAT GCOKLIEVDD ERKLRTFYEK RMATEVAADA LGEWKKYVV  
LISGNDKOC FPMKQGLVTH GRVRLLSKGG HSCYRPRRTG ERKRKSVRGC  
LWDANLSVNLG LVLVWKEKED IPGLTDTTVR RRLGPKRASR IRKLFNLSKE  
DDVRYVVRK PLNKEGKKPR TKAPKIORLV TPRVLOHKRR RIALKKORTK  
KNKEAAEYA KLLAKRMKEA KKRQEIAK RRRLLSLRAS TSKSESSQK
9. Q9CR57 (100%), 23,564.9 Da  
RL14\_MOUSE 60S ribosomal protein L14 OS=Mus musculus GN=Rpl14 PE=2 SV=3  
3 exclusive unique peptides, 3 exclusive unique spectra, 10 total spectra, 35/217 amino acids (16% coverage)  
MVFRRYVEVG RVAYISFGPH AGKLVAIVDV IDONRALVDG PCTRVRROAM  
PFKCMOLTDF ILKFPHSARO KYVRKAWEKA DINTKWAATR WAKKIDARER  
KAKMTDFDRF KVMKAKMNR RIIKTEYVKKL ORAAILKASP KKAAVAKAAI  
AAAAAAAAAAK AKVPAKKATG PCKKAAQQA PAQKAAGQA APPAKGQKQ  
KTPAQKAPAP KAAKKA
10. Q5XJF6 (100%), 24,832.0 Da  
Q5XJF6\_MOUSE Ribosomal protein OS=Mus musculus GN=Rpl10a PE=2 SV=1  
5 exclusive unique peptides, 6 exclusive unique spectra, 13 total spectra, 34/217 amino acids (16% coverage)  
MSSKVSRLDTL YEAVREVLHG NORRKRKFL E TVELOISLKN YDPOKDKRFS  
CTVRLKSTPR PKFSVCLVDG OOHDEAKAV DIPHMDEAL KLNKKNKLV  
KKLAKKYDAF LASESLIKOI PRILGGLNK AGKFPSSLTH NENMVAKVE  
VKSTIKFOMK KVLCLAVAVG HVKMTDDELV YNIHLAVNLF VSLLKNWQN  
VRALYIKSTM GKPRLY
11. P14206 (100%), 32,838.1 Da  
R5SA\_MOUSE 40S ribosomal protein SA OS=Mus musculus GN=Rpsa PE=1 SV=4  
2 exclusive unique peptides, 2 exclusive unique spectra, 2 total spectra, 33/295 amino acids (11% coverage)  
MKGALDVLDM KEEDVLKFLA AGTHLCGTNL DFOMEQIYK RKSQGIYIIN  
LKRTWEKLL AARALVAIEN PADSVISSR NTGORAVLKF AAATGATPIA  
GRFTPGFTFN OIQAAFREPR LLVVDPRAD HOPLTEASYV NPTIALCNT  
DSPLRVYDIA IPCNNKGAHS VGLMWMLAR EVLRMRGTIS REHPWEVMPD  
LVFYRDPFEI EKEEOAAEK AVTKEEFOGE WTAPAPEFTA APOPEWADWSE  
GQVQPSVPIQ QPTTEDWSAQ PATEDWSAAP TAQATEWVGA TTEWS
12. P14148 (100%), 31,421.6 Da  
RL7\_MOUSE 60S ribosomal protein L7 OS=Mus musculus GN=Rpl7 PE=2 SV=2  
3 exclusive unique peptides, 3 exclusive unique spectra, 7 total spectra, 26/270 amino acids (10% coverage)  
MEAVPEKSKK VAVTPGTLKK KVPAGPKTLK KKVPAVPEL KKKRRNFAL  
KVKRLRKKFA LKTLRKARRK LIYEKAKHYH KEYROMYRTE IARMARKA  
GNFYVPAEPK LAFVIRIRGI NGVSPKVRKV LOLLRLROI NGTFVKLNKA  
SINMLRIVPE YIAWGYPNLK SVNELIYKRG YGKINKKRIA LTDNSLIARS  
LKGFIICME DLIIHEYTVG KRFKEANNFL WPFKLSSPRG GMKKTTHFV  
EGGDAGNRED QINRLIRRMN

# Figure L

1. P62908 (100%), 26,674.5 Da  
 RS3\_MOUSE 40S ribosomal protein S3 OS=Mus musculus GN=Rps3 PE=1 SV=1  
 8 exclusive unique peptides, 16 total spectra, 94/243 amino acids (39% coverage)
 

|             |            |            |            |              |
|-------------|------------|------------|------------|--------------|
| MAVOISKRRK  | FVADGIFKAE | LNEFLTRELA | EDGYSGVEVR | VTPTRTEI I I |
| LATRTONVLG  | EKGRRIRELT | AVVOKRFGFP | EGSVELYAEK | VATRGLCAIA   |
| OAESLRYSKLL | GGLAVRRACY | GVLRFIMESG | AKGCEVVVSG | KLRGORAKSM   |
| KFVDGLMIHS  | GDPVNYVYDT | AVRHVLLROG | VLGIKVKIML | PWDPSGKIGP   |
| KKPLPDHVS I | VEPKDEILPT | TPISEQKGGK | PEPPAMPQPV | PTA          |
  
2. P62242 (100%), 24,206.4 Da  
 RS8\_MOUSE 40S ribosomal protein S8 OS=Mus musculus GN=Rps8 PE=2 SV=2  
 5 exclusive unique peptides, 5 exclusive unique spectra, 8 total spectra, 60/208 amino acids (29% coverage)
 

|            |            |            |             |            |
|------------|------------|------------|-------------|------------|
| MGISRDNWHK | RRKTGGKRKP | YHKRRKYELG | RPAANTKIGP  | RRHTVVRVC  |
| GNKKYRALRL | DVGNFSWGSE | CCTRKTRIID | VVYNASNNEL  | VRTKTLVKNC |
| IVLIDSTPYR | OWYESHYALP | LGRKKGAKLT | PEEEEEILNKK | RSKKIOKKYD |
| ERKKNAKISS | LLEEFQGGK  | LLACIASRPG | QCGRADGYVL  | EGKELEFYLR |
| KIKARKGK   |            |            |             |            |
  
3. P62702 (100%), 29,599.3 Da  
 RS4X\_MOUSE 40S ribosomal protein S4, X isoform OS=Mus musculus GN=Rps4x PE=2 SV=2  
 5 exclusive unique peptides, 7 exclusive unique spectra, 12 total spectra, 66/263 amino acids (25% coverage)
 

|             |            |            |            |             |
|-------------|------------|------------|------------|-------------|
| MARGPKKHLK  | RVAAPKHWML | DKLTGVFAPR | PSTGPHKLR  | CLPLIIFLRN  |
| RLKYALTGDE  | VKKICMORFI | KIDGKVRTDI | TYPAGFMDVI | SIDKTGENFR  |
| L IYDTKGRFA | VHRITPEEAK | YKLCVKRKIF | VGTGTFPHLV | THDARTIRYP  |
| DPLIKVNDTI  | OIDLETGIT  | DFIKFDTGNL | CMVTGGANLG | RIGVITNRR   |
| HFGSFDVVHV  | KDANGNSFAT | RLSNIFVIGK | GNKPWISLPR | GKGIRLTI AE |
| ERDKRLAAKQ  | SSG        |            |            |             |
  
4. P62754 (100%), 28,681.7 Da  
 RS6\_MOUSE 40S ribosomal protein S6 OS=Mus musculus GN=Rps6 PE=1 SV=1  
 3 exclusive unique peptides, 3 exclusive unique spectra, 3 total spectra, 32/249 amino acids (13% coverage)
 

|            |            |            |            |             |
|------------|------------|------------|------------|-------------|
| MKLNISFPAT | GCKLIEVDD  | ERKLRTFYEK | RMATEVAADA | LGE EWKGYVV |
| RISGGNDKOG | FPMKOGVLTH | GRVRLLLSKG | HSCYRPRRTG | ERKRKSVRGC  |
| IVDANLSVLN | LVIVKKGKED | IPGLTDTTVP | RRLGPKRASR | IRKLFNLSKE  |
| DDVROYVVRK | PLNKEGKPR  | TKAPKIORLV | TPRVLOHKRR | RIALKKORTK  |
| KNKEEAAEYA | KLLAKRMKEA | KEKRQEQIAK | RRLSSLRAS  | TSKSESSQK   |
  
5. P97351 (100%), 29,885.3 Da  
 RS3A\_MOUSE 40S ribosomal protein S3a OS=Mus musculus GN=Rps3a PE=1 SV=3  
 3 exclusive unique peptides, 3 exclusive unique spectra, 3 total spectra, 34/264 amino acids (13% coverage)
 

|            |             |            |             |            |
|------------|-------------|------------|-------------|------------|
| MAVGKNKRLT | KGGKKGAKKK  | VVDPFSKDDW | YDVKAPAMFN  | IRNIGKTLVT |
| RTOCTKIASD | GLKGRVFEVS  | LADLONDEVA | FRKFKLITED  | VOGKNCLTNF |
| HGMDLTRLDM | CSMVKKWOTM  | IEAHVDVKT  | DGYLLRLLFCV | GFTKKRNNOI |
| RKTSYAQHO  | VROI RKKMME | IMTREVOTND | LKEVVNKLIP  | DSIGKDIEKA |
| COSIYPLHDV | FVRKVKMLKK  | PKFELGKLME | LHGEGGSSGK  | AAGDETGAKV |
| ERADGYEPPV | QESV        |            |             |            |
  
6. P47963 (100%), 24,306.4 Da  
 RL13\_MOUSE 60S ribosomal protein L13 OS=Mus musculus GN=Rpl13 PE=2 SV=3  
 2 exclusive unique peptides, 2 exclusive unique spectra, 2 total spectra, 19/211 amino acids (9% coverage)
 

|              |            |            |            |            |
|--------------|------------|------------|------------|------------|
| MAPSRNGMIL   | KPHFHKDWOO | RVDTWFNOPA | RKIRRRKARO | AKARRIAPRP |
| ASGP I RPIVR | CPTVRYHTKV | RAGRGSLEE  | LRVAGIHKKV | ARTIGISVDP |
| RRRNKSTESL   | OANVORLKEY | RSKLILFPRK | PSAPKGDSS  | AEELKLATOL |
| TGPMPIRNV    | YKKEKARVIT | EEENFKAFA  | SLRMARANAR | LFGIRAKRAK |
| EAAEQDVEKK   | K          |            |            |            |
  
7. P62918 (100%), 28,024.8 Da  
 RL8\_MOUSE 60S ribosomal protein L8 OS=Mus musculus GN=Rpl8 PE=2 SV=2  
 2 exclusive unique peptides, 2 exclusive unique spectra, 2 total spectra, 18/257 amino acids (7% coverage)
 

|             |            |            |            |            |
|-------------|------------|------------|------------|------------|
| MGRVIRGORK  | GAGSVFRAHV | KHRKGAARLR | AVDFAERHGY | IKGIVKDIH  |
| DPGRGAPLAK  | VVFRDPYRFK | KRTELFIAAE | GIHTGOFVYC | GKKAOLNIGN |
| VLPVGTMPPEG | TIVCCLEEKP | GDRGKLARAS | GNATYVISHN | PETKTRVKL  |
| PSGSKKVISS  | ANRAVGVVA  | GGGRIDKPIL | KAGRAYHKYK | AKRNCWPRVR |
| CVAMNPVEHP  | FGGGNHQHIG | KPSTIRRDAP | AGRKVGLIAA | RRTGRLRGTK |
| TVQEKEN     |            |            |            |            |

# Figure M

1. P35979 (100%), 17,805.0 Da  
RL12\_MOUSE 60S ribosomal protein L12 OS=Mus musculus GN=Rpl12 PE=1 SV=2  
7 exclusive unique peptides, 9 exclusive unique spectra, 25 total spectra, 98/165 amino acids (59% coverage)  
MPPKFDPNV KVVYLRCTGG EVGATSALAP KIGPLGLSPK KVGDDIAKAT  
GDWGLRITV KLTIQNRDQ IEVVPSASAL IIAKALKEPR DRKKOKNIK  
SGNITFDEIV NIAROMRRHS LARELSCTIK EILCTAQSVM CNVDGRHPHD  
IIDDINSGAV ECPAS
2. P63276 (100%), 15,524.5 Da  
RS17\_MOUSE 40S ribosomal protein S17 OS=Mus musculus GN=Rps17 PE=1 SV=2  
5 exclusive unique peptides, 6 exclusive unique spectra, 11 total spectra, 66/135 amino acids (49% coverage)  
MGRVRTKTVK KAARVIEEKY YTRLGNDFT NKRVCCEIAI IPSKCLRNI  
AGYVTHLMKR IORGPPVRCIS IKLOEERER RDNVYVPSA LDQEIIEVDP  
DTKEMLKLLD PGLSNLQVT QPTVGNMFKT PRGAV
3. P62301 (100%), 17,223.3 Da  
RS13\_MOUSE 50S ribosomal protein S13 OS=Mus musculus GN=Rps13 PE=2 SV=2  
7 exclusive unique peptides, 7 exclusive unique spectra, 17 total spectra, 65/151 amino acids (43% coverage)  
MGRMHAPGKG LSOSALPYRR SVPTWLKLTSD DVKVEOIKYL AKKGLTSPQI  
GVILRDSHGQ ADVRFVTGNK IRLRLKSGEL APDLPELVH LIRKAVAVRK  
HLERNRDKD AKFRLLILIES RIHRLRARIYK TKRVLPPNWK YESSTASALV  
A
4. P62281 (100%), 18,431.3 Da  
RS11\_MOUSE 40S ribosomal protein S11 OS=Mus musculus GN=Rps11 PE=2 SV=3  
8 exclusive unique peptides, 8 exclusive unique spectra, 19 total spectra, 64/158 amino acids (41% coverage)  
MNDIOTERAY OKOPTIFONK KRVLLGETGK EKLPRYKNI GLCFKTPKEA  
IEGTDKIKKQ PFTGNVIRG RILSGVYTKM KHORTIVIR DYLYIRKYN  
RFEKRHKNS VHLSPCFRDV QIGDIVTVGE CRPLSKTVRF NVLKVTKAAG  
TKKQFKF
5. P62849 (100%), 15,423.8 Da  
RS24\_MOUSE 40S ribosomal protein S24 OS=Mus musculus GN=Rps24 PE=2 SV=1  
4 exclusive unique peptides, 5 exclusive unique spectra, 8 total spectra, 46/133 amino acids (35% coverage)  
MNDVTYIRTR KMTNRLLOR KOMVIDLPHG GKATVPKTEI REKLAKMYKT  
TDPVIFVFGF RTHFGGKTT GFGMIYDSDL YAKKNEPKHR LARHGLYEK  
KTSRQKQRK KNRMKVVRGT AKANVGAGKK PKE
6. Q9CXW4 (100%), 20,253.2 Da  
RL11\_MOUSE 60S ribosomal protein L11 OS=Mus musculus GN=Rpl11 PE=1 SV=4  
5 exclusive unique peptides, 5 exclusive unique spectra, 13 total spectra, 55/178 amino acids (31% coverage)  
MADODGEKEN PMRELRIKLL CLNICVGESE DRLTRAAKVL EOLTGOTPVF  
SKARYTVRSF GIRNREKIAV HCTVRGAKAE EILEKGLKVR EYELRKNMFS  
DTGNFGGILD EHDLDGIKVD PSIGIYGLDF YVVLGRPGFS IADKRRRTGC  
IGAKHRISKE EMRWFQXKY DGIILLPGK
7. P62751 (100%), 17,696.2 Da  
RL23A\_MOUSE 60S ribosomal protein L23a OS=Mus musculus GN=Rpl23a PE=1 SV=1  
5 exclusive unique peptides, 5 exclusive unique spectra, 17 total spectra, 46/156 amino acids (29% coverage)  
MAPKAKKEAP APPKAEAKK ALKAKKAVLK GVSHSHKKKI RTSPTFRPK  
TLRLRROPKY PRKSAPRRNK LDHYAIKFP LTTESAMKKI EDNNTLVFIV  
DVKANQHQIK QAVKRLYDID VAVNVLIRP DGEKAYVR L APDYDALDVA  
NKIGTI
8. P47963 (100%), 24,306.4 Da  
RL13\_MOUSE 60S ribosomal protein L13 OS=Mus musculus GN=Rpl13 PE=2 SV=3  
6 exclusive unique peptides, 7 exclusive unique spectra, 19 total spectra, 62/211 amino acids (29% coverage)  
MAPSRNGMIL KPHFKDWOV RVDTFWENOPA RKIRRRKARO AKARRIAPRP  
ASGPIRPIVR CPTVRYHTKV RAGRGFSLLEE LRVAGIHKVV ARTIGISVDP  
RRNKSTESL DANVORLKEY RSKLILFRPK PSAPKGDSS AEELKLATOL  
TCPVMPIRNV YKKEKARVIT EEKNFKAPA SLBMANAR LFGIRAKRRL  
EAAEQDVEKK K
9. P62911 (100%), 15,860.4 Da  
RL32\_MOUSE 60S ribosomal protein L32 OS=Mus musculus GN=Rpl32 PE=2 SV=2  
3 exclusive unique peptides, 3 exclusive unique spectra, 10 total spectra, 37/135 amino acids (27% coverage)  
MAALRPLVKP KIVKRRTKKF IRHOSDRYVK IKRNWRKPRG IDNRVRRRFK  
GOTLMPNIGY GSNKTKHML PSGRKFLVH NVKELEVLML CNKSYCAEIA  
HNVSSNRRKA IVERAAQLAI RVTNPNARLR SEENE
10. P62852 (100%), 13,743.0 Da  
RS25\_MOUSE 40S ribosomal protein S25 OS=Mus musculus GN=Rps25 PE=2 SV=1  
4 exclusive unique peptides, 4 exclusive unique spectra, 17 total spectra, 30/125 amino acids (24% coverage)  
MPPKDDKKKK DAGSAKAKDK DPVNKSGGKA KKKKWSKGV RDKLNNLVLF  
DKATYDKLCK EVPNKELTP AVVSERLKIR GSLARAALQE LLSKGLIKLV  
SKRAQVIYT RNTKGDAPA ACEDA
11. P62843 (100%), 17,040.8 Da  
RS15\_MOUSE 40S ribosomal protein S15 OS=Mus musculus GN=Rps15 PE=2 SV=2  
2 exclusive unique peptides, 3 exclusive unique spectra, 8 total spectra, 32/145 amino acids (22% coverage)  
MAEVEQKKR TFRKFTYRGV DLDOLLDSY EQLMOLYSAR ORRRNRLR  
RQHSLLKRL RKAKKEAPPK EKPEVVRTHL RDMILLENV GSNVGVYNGK  
TFNQVEIKPE MIGHYLGEPF IYKPKVHGR PGIGATHSSR FIPLK
12. Q6ZM7 (100%), 14,553.6 Da  
RL35\_MOUSE 60S ribosomal protein L35 OS=Mus musculus GN=Rpl35 PE=2 SV=1  
2 exclusive unique peptides, 2 exclusive unique spectra, 8 total spectra, 23/123 amino acids (19% coverage)  
MAKIKARDLR GKKKEELLKQ LDDLKVELSO LRVAKVTGGA ASKLSKIRVV  
RKSIAARVLTV INOTOKENLR KFYKGGKYK LDLRPPKTRA MRRRLTKHEE  
KLTKKQQRK ERLYPLRKYA VKA
13. P61255 (100%), 17,258.4 Da  
RL26\_MOUSE 60S ribosomal protein L26 OS=Mus musculus GN=Rpl26 PE=2 SV=1  
4 exclusive unique peptides, 4 exclusive unique spectra, 18 total spectra, 26/145 amino acids (18% coverage)  
MKFNPFVTSQ RSKNRKRHFN APSHIRRKIM SSPLSK ELRO KYNVRSMP IR  
KDELEVQVVRG HYKGOOIGKV VOVYRKYVI YIERVOREKA NCTTVHVGII  
PSKVVITRLK LDKDRKILE RKAQRQVQK EKGKYKEETI EKMQE
14. P41105 (100%), 15,733.7 Da  
RL28\_MOUSE 60S ribosomal protein L28 OS=Mus musculus GN=Rpl28 PE=1 SV=2  
2 exclusive unique peptides, 2 exclusive unique spectra, 7 total spectra, 22/137 amino acids (16% coverage)  
MSAHLQWVVV RNCSSFLIKR NKOTYSTEPN NLKARNSFRY NCLIHRRKTVG  
VEPAADCGMV VVVMKRRSGO RKPATSYVRT TINKNARATL SSIRHMIRKN  
KYRPLDRMAA IRRASAILRS QKPVVVKRRR TRPTKSS
15. P14115 (100%), 16,605.4 Da  
RL27A\_MOUSE 60S ribosomal protein L27a OS=Mus musculus GN=Rpl27a PE=2 SV=5  
2 exclusive unique peptides, 2 exclusive unique spectra, 7 total spectra, 23/148 amino acids (16% coverage)  
MPSRLRKRTR LRGHVSHHG RIGKRRKHPG GRNAGGMHH HRINFDKYHP  
GYFCVGMRRH YHLKRNFOSFC PTVNLKDLWT LVSEOTRVNA AKNKTGVAPI  
IDVVRSGYVK VLKGLKLPQ PVIVAKKFFS RRAEEKIKGV GGACVLVA
16. P63325 (100%), 18,916.3 Da  
RS10\_MOUSE 40S ribosomal protein S10 OS=Mus musculus GN=Rps10 PE=1 SV=1  
2 exclusive unique peptides, 2 exclusive unique spectra, 6 total spectra, 23/165 amino acids (14% coverage)  
MLMPKKNRIT IYELLFKEGV MVAKKDVHMP KPELADKNV PNLHVMKAMO  
SLKSRGVYKE OFAWRHFWYV LTNEGIOYLR DYHLHPPEIV PATLRRSRPE  
TGRPRKCPGE GERPARFTRG EADRTYRYS AVPPGADKKA EAGAGSATEF  
QRFGGFGRGR GQPPQ
17. Q8BP67 (100%), 17,779.5 Da  
RL24\_MOUSE 60S ribosomal protein L24 OS=Mus musculus GN=Rpl24 PE=2 SV=2  
2 exclusive unique peptides, 3 exclusive unique spectra, 11 total spectra, 21/157 amino acids (13% coverage)  
MKVELCSFG YKIYPGHRR YARTDGKVFQ FLNAKCESAF LSKRNPROIN  
WTVLYRRKHK KGOSEIOKK RTRRAVKFOR AITGASLADI MAKRNKPEV  
RKAQREAIR AAKEAKKAKQ ASKKTAMAAA KAPTAAAPKQ KIVKPVKVA  
PVGCKR

# Figure N

1. P62270 (100%), 17,719.3 Da  
RS18\_MOUSE 40S ribosomal protein S18 OS=Mus musculus GN=Rps18 PE=1 SV=3  
6 exclusive unique peptides, 6 exclusive unique spectra, 7 total spectra, 58/152 amino acids (38% coverage)  
MSLV IPEKFO HILRVLNTNI DGRRKIAFAI TAIKGVGRRY AHVVLKADI  
DLTKRAGELT EDEVERVITI MONPROYKIP DWFLNRKQDV KDGKYSOVLA  
NGLDNKLRLED LERLKKIRAH RGLRHFVGLR VRGQHTKTTG RRGRTVGVSK  
KK
2. P35979 (100%), 17,805.0 Da  
RL12\_MOUSE 60S ribosomal protein L12 OS=Mus musculus GN=Rpl12 PE=1 SV=2  
4 exclusive unique peptides, 4 exclusive unique spectra, 4 total spectra, 48/165 amino acids (29% coverage)  
MPPK FDPNEV KVVYLRCTGC EVGATSALAP KIGPLGLSPK KVGDDIAKAT  
GDWVKGLRITV KLTIQNROAD IEVVPSASAL IIAKALKEPPR DRKKOKNIKH  
SGNITFDEIV NIAROMRRHS LARELSGTIK EILGTAQSVG CNVDGRHPHD  
IIDDINSGAV ECPAS
3. E9Q132 (100%), 15,347.5 Da  
E9Q132\_MOUSE 60S ribosomal protein L24 OS=Mus musculus GN=Rpl24 PE=2 SV=1  
4 exclusive unique peptides, 5 exclusive unique spectra, 5 total spectra, 30/133 amino acids (23% coverage)  
MKVELCSFSG YKLYPGHRR YARTDGK VFO FLNAKCESAF LSKRNPROIN  
WTWLYRRKHK KGOSEELQKK RTRRAVKFOR AITGASLADI MAKRNQKPEV  
RKAQREQAIR AAKEAKKAKQ ASKKTAMAAA KVV
4. Q9CXW4 (100%), 20,253.2 Da  
RL11\_MOUSE 60S ribosomal protein L11 OS=Mus musculus GN=Rpl11 PE=1 SV=4  
3 exclusive unique peptides, 3 exclusive unique spectra, 3 total spectra, 39/178 amino acids (22% coverage)  
MAODOGEKEN PMRELIRIKL CLNICVGESG DRLTRAACKVL EOLTGOTPVF  
SKARYTVRSF GIRRNEKIAV HCTVIRGAKAE EILEKGLKVR EYELRKNNFS  
DTGNFGFGIO EHIDLGIKYD PSIGIYGLDF YVVLGRPGFS IADKKRRITGC  
IGAKHRISKE EAMRWFAQKY DGILLPGK
5. P62301 (100%), 17,223.3 Da  
RS13\_MOUSE 40S ribosomal protein S13 OS=Mus musculus GN=Rps13 PE=2 SV=2  
3 exclusive unique peptides, 3 exclusive unique spectra, 3 total spectra, 30/151 amino acids (20% coverage)  
MGRMHAPGKG LSQSALPYRR SVPTWLKLTSD DDKVEOIKYL AKKGLTPSQI  
GVILRDSHGVAOVRFVTGNK LLRILKSKGL APDLPEDLYH LIKKAVAVRK  
HLERNRDKDK AKFRLLILIES RIHRLARYYK TKRVLPPNWK YESSTASALV  
A
6. P62911 (100%), 15,860.4 Da  
RL32\_MOUSE 60S ribosomal protein L32 OS=Mus musculus GN=Rpl32 PE=2 SV=2  
2 exclusive unique peptides, 2 exclusive unique spectra, 2 total spectra, 27/135 amino acids (20% coverage)  
MAALRPLVKP KIVKRTKFF IRHOSDRYVK IKRNWRKPRG IDNRVRRRFK  
GOILMPNIGY GSNKKTTHML PSGFRKFLVH NVKELEVLLM CNKSYCAEIA  
HNVSSENKKA IVERAAQLAI RVTNPNARLR SEENE
7. B1ARA3 (100%), 12,217.1 Da  
B1ARA3\_MOUSE 60S ribosomal protein L26 (Fragment) OS=Mus musculus GN=Rpl26 PE=2 SV=1  
3 exclusive unique peptides, 3 exclusive unique spectra, 3 total spectra, 18/103 amino acids (17% coverage)  
MKFNPFVTSR RSKNRKRHFN APSHIRKIM SSPLSKELRO KYNVRSMPIR  
KDDEVQVVRG HYKGGQIGKV VQVYRKKYVI YIERVQREKA NGTTVHVGIIH  
PSK
8. P14115 (100%), 16,605.4 Da  
RL27A\_MOUSE 60S ribosomal protein L27a OS=Mus musculus GN=Rpl27a PE=2 SV=5  
2 exclusive unique peptides, 2 exclusive unique spectra, 2 total spectra, 23/148 amino acids (16% coverage)  
MPSRLRKTRK LRGHVSHHG RIGKHRKHHPG GRNAGGMHH HRINFDKYHP  
GYFGYVGMRH YHLKRNOSFC PTVNLDKLTW LVSEOTRVNA AKNKTGVAPI  
IDVVRSGYYK VLGKGLPKQ PVIKAKFFS RRAEEKIKGV GGACVLVA
9. P62852 (100%), 13,743.0 Da  
RS25\_MOUSE 40S ribosomal protein S25 OS=Mus musculus GN=Rps25 PE=2 SV=1  
2 exclusive unique peptides, 2 exclusive unique spectra, 2 total spectra, 18/125 amino acids (14% coverage)  
MPPKDDK KKK DACKS AKKDK DPNKSGGKA KKKKWSKGV RDKLNNLVLF  
DKATYDKLCK EVPNYKLITP AVVSERLKIR GSLAR AALQE LLSKGLIKLV  
SKHRAQVIYT RNTKGGDAPA AGEDA
10. P63325 (100%), 18,916.3 Da  
RS10\_MOUSE 40S ribosomal protein S10 OS=Mus musculus GN=Rps10 PE=1 SV=1  
2 exclusive unique peptides, 2 exclusive unique spectra, 2 total spectra, 23/165 amino acids (14% coverage)  
MLMPKKNR IA IYELLFKEGV MVAKKDVHMP KHP ELADKNV PNLHVMKAMO  
SLKSRGYVKE OFAWRHFWY LTNEGIOYLR DYLLHLPPEIV PATLRRSRPE  
TGRPRPKGPE GERPARFTRG EADRDTYRRS AVPPGADKKA EAGAGSATEF  
QFRGGFGRGR GQPPQ
11. P62281 (100%), 18,431.3 Da  
RS11\_MOUSE 40S ribosomal protein S11 OS=Mus musculus GN=Rps11 PE=2 SV=3  
3 exclusive unique peptides, 3 exclusive unique spectra, 3 total spectra, 19/158 amino acids (12% coverage)  
MADIQTERAY OKOPTIFONK KR VLLGETGK EKLPRYYKNI GLGFKTPKEA  
IECTYIDKKC PFTGNVSIK RILSGVVTM KMORTIVIRR DYLYHIRKYN  
REFKRKNMS VHLSPCFRDV QIGDIVTVGE CRPLSKTVRF NVLKVTKAAC  
TKKQFQKF

# Figure O

- P62908 (100%), 26,674.5 Da  
RS3\_MOUSE 40S ribosomal protein S3 OS=Mus musculus GN=Rps3 PE=1 SV=1  
13 exclusive unique peptides, 13 exclusive unique spectra, 22 total spectra, 136/243 amino acids (56% coverage)

```

MAVQISKKRK FVADGIFKAE LNEFLTRELA EDGYSGVEVR VTPTRTEIII
LATRTQNVLG EGRRRIRELT AVVQKRFQFP EGSVELYAEK VATRGLCAIA
QAESLRYKLL GGLAVRRACY GVLRFIMESG AKGCEVVVSG KLRGORAKSM
KFVDGLMIHS GDPVNYVDY AVRHVLLRSG VLGIKVKIML PWDPSGKIGP
KPLPLDHVSI VEPKDEILPT TPISEQGGK PEPPAMPQPV PTA

```
- P97351 (100%), 29,885.3 Da  
RS3A\_MOUSE 40S ribosomal protein S3a OS=Mus musculus GN=Rps3a PE=1 SV=3  
8 exclusive unique peptides, 8 exclusive unique spectra, 11 total spectra, 90/264 amino acids (34% coverage)

```

MAVGGKNRRLT KGGKKGAKKK VDPFSSKDDW YDVKAPAMFN IRNIGKTLVT
RTOCTKIASD GLKGRVFEVS LADLONDEVA FRKFKLITED VQGNCLTNF
HGMDLTRDKM CSMVKKWOTM IEAHVDVKT DGYLLRLFCV GFTKRRNOI
RKTSAOHOQ VROIIRKMM EIMTRVOTND LKEVVKLIP DSIGKDIEKA
COSIYPLHDV FVRKVKMLKK PKFELGKLME LHGEGGSSGK AAGDETGAIV
ERADGYEPPV QESV

```
- P62242 (100%), 24,206.4 Da  
RS8\_MOUSE 40S ribosomal protein S8 OS=Mus musculus GN=Rps8 PE=2 SV=2  
5 exclusive unique peptides, 6 exclusive unique spectra, 9 total spectra, 60/208 amino acids (29% coverage)

```

MGI SRDNWHK RRKTGGKRP YHKRKYELG RPAANTKIGP RRIHTVVRG
GNKKYRALRL DVGNFSWGSE CCTRKRITID VVYNASNNEI VRTKTLVKNC
IVLIDSTPYR OWYESHYALP LGRKKGAKLT PEEEEILNKK RSKKIOKKYD
ERKKNAKISS LLEEQQFQGG LLACIASRPG QCGRADGYVL EGKLELFYLR
KIKARKGK

```
- P62702 (100%), 29,599.3 Da  
RS4X\_MOUSE 40S ribosomal protein S4, X isoform OS=Mus musculus GN=Rps4x PE=2 SV=2  
5 exclusive unique peptides, 7 exclusive unique spectra, 10 total spectra, 66/263 amino acids (25% coverage)

```

MARGPKKHLK RVAAPKHWML DKLTGVFAPR PSTGPHKLR CLPLIFLRN
RLKYALTGDE VKKICMORFI KIDGKVRTDI TYPAGFMVDI SIDKTGENFR
LIYDITKGRFA VHRITPEEAK YKLCVKRKF VGTGKIPHLV THDARTIRYP
DPLIKVNDTI QIDLETGKIT FIKFDTGNI CMVTGGANLG RICVITNREI
HPGSFDVHV KDANGSFAT RLSNIFVIGK GNKPWISLPR KGIRLTI AE
ERDKRLAAKQ SSG

```
- P62754 (100%), 28,681.7 Da  
RS6\_MOUSE 40S ribosomal protein S6 OS=Mus musculus GN=Rps6 PE=1 SV=1  
4 exclusive unique peptides, 4 exclusive unique spectra, 5 total spectra, 49/249 amino acids (20% coverage)

```

MKLNISFPAT GCOKLEIVDD ERKLRTFYEK RMATEVAADA LGEEWKGYVV
RISGGNDKOG FPMKQVLTH GRVRLLSKSG HSCYRPRRTG ERKRKSVRGLT
IVDANLSVLN LVIVKKGKED IPGLTDTTVP RRLGPKRAS IRKLFNLSKE
DDVROYVVRK PLNKEGKPR TKAPKIORLV TPRVLOHKRR RIALKKORTK
KNKEEAAEYA KLLAKRMKEA KEKRQEQIAK RRLSSLRAS TSKSESSQK

```
- P47963 (100%), 24,306.4 Da  
RL13\_MOUSE 60S ribosomal protein L13 OS=Mus musculus GN=Rpl13 PE=2 SV=3  
4 exclusive unique peptides, 4 exclusive unique spectra, 4 total spectra, 42/211 amino acids (20% coverage)

```

MAPSRNGMIL KPHFHKDWOV RVDTFWNOVA RKIRRRKARO AKARRIAPRP
ASGPIRPIVR CPTVRYHTKV RAGRGFSLEE LRVAGIHKV ARTIGLSVDP
RRRNKSTESL QANVRIKEY RSKLILFPRK PSAPKKGDS AEELKLATOL
TGPVMPIRNV YKKEKARVIT EEEKNFKAFA SLRMARANAR LFGIRAKRAK
EAAEQDVEKK K

```
- Q9CR57 (100%), 23,564.9 Da  
RL14\_MOUSE 60S ribosomal protein L14 OS=Mus musculus GN=Rpl14 PE=2 SV=3  
3 exclusive unique peptides, 3 exclusive unique spectra, 4 total spectra, 37/217 amino acids (17% coverage)

```

MVFRRYVEVG RVAYISFGPH AGKLVAVDV IDONRALVDG PCTRVRRQAM
PFKCMOLTDI ILKFPHSARO KYVRKAWEKA DINTKWAATR WAKKIDARER
KAKMTDFDRF KVMKAKMRN RI IKTEVKKL ORAAILKASP KKAATAAAT
AAAAAAAAAAK AKVPAKATG PGKKAAGQKA PAQKAAGQKA APPAKGQKQ
KTPAQKAPAP KAAGKKA

```
- P25444 (100%), 31,232.2 Da  
RS2\_MOUSE 40S ribosomal protein S2 OS=Mus musculus GN=Rps2 PE=2 SV=3  
4 exclusive unique peptides, 4 exclusive unique spectra, 6 total spectra, 39/293 amino acids (13% coverage)

```

MADDAGAAG PGPPGGPGLG GRGGFRGGFG SGLRGRGRGR GRGRGRGRGA
RGGKAEDKEW IPVTKLGRLV KDMKIKSLEE IYLFSLPIK SEIIDFFLGA
SLKDEVLIKIM PVOKOTRAGO RTRFKAFVAI GDYNGHVGLG VKCSKEVATA
IRGAIILAKL SIVPVRRGYW GNKIGKPHTV PCKVTGR CGS VLVRLIPAPR
CTGIVSAPVP KKLMMAGID DCYTSARGCT ATLGNFAKAT FDAISKTSY
LTPDLWKETV FTKSPYQEFTH DHLVKTHTRV SVQRTQAPAV ATT

```
- Q5XJF6 (100%), 24,832.0 Da  
Q5XJF6\_MOUSE Ribosomal protein OS=Mus musculus GN=Rpl10a PE=2 SV=1  
2 exclusive unique peptides, 2 exclusive unique spectra, 2 total spectra, 20/217 amino acids (9% coverage)

```

MSSKVSRTDI YEAVREVLHG NORRRKRFLE TVELOISLKN YDPOKDKRFS
CTVRLKSTPR PKFSVCVLGD OOHCEAKAV DIPHMIEAL KKLNKNKKLV
KKLAKK YDAF LASESLRQI PRILGPGLNK AGKFPSSLTH NENMKKVD E
VKSTIKFOMK KVLCLAVAVG HVKMTDDELV YNHLAVNLF VSLLMKNWQN
VRALYIKSTM GKPRLY

```
- P62918 (100%), 28,024.8 Da  
RL8\_MOUSE 60S ribosomal protein L8 OS=Mus musculus GN=Rpl8 PE=2 SV=2  
2 exclusive unique peptides, 2 exclusive unique spectra, 3 total spectra, 18/257 amino acids (7% coverage)

```

MGRVIRGORK GAGSVFRAHV KHRKGAARLR AVDFAERHGY IKGIVKDIH
DPRGAPLAK VVFRDPYRFK KRTFLFAAE GIHTGOFVYC GKKAQLNIGN
VLPVGTMPFC TIVCCLEFKP GDRGKLARS GNATVIVSHN PETKTRVKL
PSGSKKVISS ANRAVGVVA GCGRIDKPI LKAGRAYHKYK AKRNCWPRV R
GVAMPNVEHP FGGGNHQHIG KPSTIRRDAP AGRKVGLIAA RRTGRLRGTK
TVQEKEN

```

# Figure P

- P63276 (100%), 15,524.5 Da**  
**R517\_MOUSE 40S ribosomal protein S17 OS=Mus musculus GN=Rps17 PE=1 SV=2**  
 5 exclusive unique peptides, 5 exclusive unique spectra, 5 total spectra, 53/135 amino acids (39% coverage)

MGRVTRTKTVK KAARVIEKY YTR**LGNDFHT** NKR**VCEEIAI** **IPSKLLRNKI**  
**AGYVTHLNR** IORGPPVRSI IKLOEERER RDNYVEVSA LDQEIIIEVDP  
 DTKEMLK**LLD** **FGSLNSLQVT** **QPVTGMNFKT** PRGAV
- P62751 (100%), 17,696.2 Da**  
**RL23A\_MOUSE 60S ribosomal protein L23a OS=Mus musculus GN=Rpl23a PE=1 SV=1**  
 5 exclusive unique peptides, 5 exclusive unique spectra, 5 total spectra, 56/156 amino acids (36% coverage)

MAPKAKKEAP APPKAEAKK ALKAKKAVLK GVHSHKKKKI **RTSPTFRPK**  
 TLRRLRROPY PRKSAPRRNK LDHYALIK**FP** **LTTEAMKKI** **EDNNTLVFIV**  
**DVRANKHQIK** QAVK**LYDID** **VAKVNTLIRP** **DGEKAYVRL** **APDYDALDVA**  
**NKIGIT**
- P35979 (100%), 17,805.0 Da**  
**RL12\_MOUSE 60S ribosomal protein L12 OS=Mus musculus GN=Rpl12 PE=1 SV=2**  
 4 exclusive unique peptides, 5 exclusive unique spectra, 7 total spectra, 56/165 amino acids (34% coverage)

MPPKFDPNV KVVYLR**CTGG** **EVGATSAAP** **KIGPLGLSPK** KYGDDIAKAT  
 GDWGLRITV KLTION**DAQ** **LEVVPASAL** **IJKALKFPPR** DRKKOKNIKH  
 SGNITFDEIV NIARQMRRHS LARELSGTIK **EILGTAQSVG** **CNVDCRHPHD**  
 IIDDINSGAV ECPMS
- P62301 (100%), 17,223.3 Da**  
**R513\_MOUSE 40S ribosomal protein S13 OS=Mus musculus GN=Rps13 PE=2 SV=2**  
 5 exclusive unique peptides, 5 exclusive unique spectra, 6 total spectra, 51/151 amino acids (34% coverage)

MGRMHAPGK LSOSALPYRR SVPTWLK**ITS** **DDVKEIYKL** **AKKGLTFSOI**  
**GLVLRD**SHGV ADVRFVTKN ILRLIKSK**GL** **APDLPELHYL** **LIKKAVAVRK**  
 HLEERNKDKD AKRFLILIES RIHLRLARYK **TKRVLPPNWK** **YESSTASALV**  
**A**
- Q9CQW4 (100%), 20,253.2 Da**  
**RL11\_MOUSE 60S ribosomal protein L11 OS=Mus musculus GN=Rpl11 PE=1 SV=4**  
 5 exclusive unique peptides, 5 exclusive unique spectra, 5 total spectra, 51/178 amino acids (29% coverage)

MAODGEEKN PMRELIRIK **ELNLCVGESE** **DRILTRAAKVL** **EOLGTQIPVF**  
**SKARYTVRS** GIRRNE**IAV** **HCTVRCAGAE** **EILELGLKVR** EYELRKNNSF  
 DTCNFGFGIO EHIIDLGKYO **PSICIVGLDF** YVVLGRPGFS IADKRRRTG  
 IGAKHRISKE **FAMRWQQKW** **DGILLPGK**
- P62281 (100%), 18,431.3 Da**  
**R511\_MOUSE 40S ribosomal protein S11 OS=Mus musculus GN=Rps11 PE=2 SV=3**  
 4 exclusive unique peptides, 4 exclusive unique spectra, 4 total spectra, 48/158 amino acids (30% coverage)

MADIOTERAY **KOQPTTIFONK** **KRVLLGETGK** **EKLPRYYKNI** **GLGFKTPKEA**  
**LEGTVIDNK** **CFPTGNVSTIRG** **RILSGVVTKM** **KMORTIVIRR** **DYLHVIKRYN**  
 RFEKRHKNS VHLSPCFR**VDV** **QIGDVIYVGE** **CRPLSKTRVR** **NVLKVTKAG**  
 TKKQFKF
- Q6ZWN5 (100%), 22,592.5 Da**  
**R59\_MOUSE 40S ribosomal protein S9 OS=Mus musculus GN=Rps9 PE=2 SV=3**  
 8 exclusive unique peptides, 8 exclusive unique spectra, 9 total spectra, 54/194 amino acids (28% coverage)

MPVARSWVCR KTYVTPRRPF EKSRIDOLF **LIGEYGLRNN** **RVWVRKFTL**  
 AKIRKAREL LTLDEKPPR **LEEGNALLR** **LVRIGVLDG** **RMKIDYILGL**  
**KIIEFLERRL** QTOVFKLGLA KSIHHRVLL **RORHIRVRKO** **VVNIIPSFIVR**  
 LDSQKHIDFS LRSYPYGGRR GRVRRKNNAK **GGGAGAGDD** **EEDD**
- P62911 (100%), 15,860.4 Da**  
**RL32\_MOUSE 60S ribosomal protein L32 OS=Mus musculus GN=Rpl32 PE=2 SV=2**  
 3 exclusive unique peptides, 3 exclusive unique spectra, 3 total spectra, 37/135 amino acids (27% coverage)

MAALRPLVPR KIVKRRTKF IRHOSDRVVK IKNWRKPRG IDNRVRRFK  
**GOILPNICY** **GSMKTKHML** **PSGFRKFLVH** **NVKELEVLN** **CNKSYCAEIA**  
**HNVSSKNRKA** IVERAAQLAI RVTNPNARLR SEENE
- P62900 (100%), 14,463.2 Da**  
**RL31\_MOUSE 60S ribosomal protein L31 OS=Mus musculus GN=Rpl31 PE=2 SV=1**  
 3 exclusive unique peptides, 3 exclusive unique spectra, 6 total spectra, 33/125 amino acids (26% coverage)

MAPAkkGGEK KKG**SAINEV** **VTRREYTI**NIH KRIHG**VGF**KK RAPRALKEIR  
 KFAMKEMGTP **DVRIDTRLNK** **AVWAKGIRNV** **PYRIRVRLSR** **KRNEDEDSN**  
**KYTLVTVYV** **VTFEKNLQTV** **NVDEN**
- P62849 (100%), 15,423.8 Da**  
**RS24\_MOUSE 40S ribosomal protein S24 OS=Mus musculus GN=Rps24 PE=2 SV=1**  
 3 exclusive unique peptides, 3 exclusive unique spectra, 4 total spectra, 35/133 amino acids (26% coverage)

**MNDTVIIRTR** **KFMTNRLOR** **KOMVIDVLHP** **GKATVPKTEI** **REKLAKMYKT**  
**TPDVIIVFVG** **RTHFGGCKT** **FGFMIDYSLD** **YANKNEPKHR** **LARHGLYEKK**  
 KTSRKRQRK KNRMKVRRG AKANVAGGK PKE
- B1ARA3 (100%), 12,217.1 Da**  
**B1ARA3\_MOUSE 60S ribosomal protein L26 (Fragment) OS=Mus musculus GN=Rpl26 PE=2 SV=1**  
 4 exclusive unique peptides, 4 exclusive unique spectra, 8 total spectra, 26/103 amino acids (25% coverage)

**MKFNPFVTS**D **R**SKNRKRHFN **APSHIRRKIM** **SSPLSKELRO** **KYNVRSMPIR**  
**KDDEVQVVRC** **HYKGGQIGKV** **VQYRKYKVI** **YIERVQREKA** **NCTTVHVGII**  
**PSK**
- P62852 (100%), 13,743.0 Da**  
**RS25\_MOUSE 40S ribosomal protein S25 OS=Mus musculus GN=Rps25 PE=2 SV=1**  
 4 exclusive unique peptides, 4 exclusive unique spectra, 4 total spectra, 27/125 amino acids (22% coverage)

MPPKDDKKK DAGKSAKKDK DPVNSGCKA KKKKWSCKV **RDKLNLLVLF**  
**DKATYDKLCK** **FVPNKYLITP** **AVVSELRKIR** **GSLRAALQE** **LLSKGLIKLV**  
**SKHRAQVIYT** **RNTKCGDAPA** **AGEDA**
- P62717 (100%), 20,732.6 Da**  
**RL18A\_MOUSE 60S ribosomal protein L18a OS=Mus musculus GN=Rpl18a PE=2 SV=1**  
 3 exclusive unique peptides, 3 exclusive unique spectra, 4 total spectra, 35/176 amino acids (20% coverage)

MKASGTLREY **KVVGRCLPTP** **KCHTTPPLYRM** **RIIFAPNHVVA** **KSRFEWYVSO**  
**LKKMKSSGE** **IYCGOVFEK** **SFLRVKNFG** **WLRYSRSST** **HMWREYRDI**  
**TTAGAVTQCV** **RDMGARHRAR** **AHSIOIMKVE** **EIAAGKCRRP** **AVKQFHDSKI**  
**KFPLPHRVLR** **RQHKPRFTTK** **RPNTF**
- P47963 (100%), 24,306.4 Da**  
**RL13\_MOUSE 60S ribosomal protein L13 OS=Mus musculus GN=Rpl13 PE=2 SV=3**  
 4 exclusive unique peptides, 4 exclusive unique spectra, 4 total spectra, 42/211 amino acids (20% coverage)

MAPSRNCGIL **KPHFKDWOOD** **RVDTFWNOA** **RKIRRRKARO** **AKARRIAPRP**  
**ASGPIRPIVR** **CPTVRYHTKV** **RAGRGFSLLE** **LRVAGIHKVK** **ARTIGLSVDP**  
**RRNRSTESL** **OANVORLKEV** **RSKLILFPKR** **PSAPKGDSS** **AELKLATOL**  
**TCPVMP**IRNV **YKKEKARVIT** **EEEKNFKFA** **SLRMARANAR** **LFGIRAKRAK**  
**EAAEQVEKK**
- G3UZJ6 (100%), 14,630.0 Da**  
**G3UZJ6\_MOUSE 60S ribosomal protein L18 (Fragment) OS=Mus musculus GN=Rpl18 PE=2 SV=1**  
 2 exclusive unique peptides, 2 exclusive unique spectra, 24/126 amino acids (19% coverage)

MVVHLPOGVD **IRHNKDRKVR** **RKEPKSODIY** **LRLLVLYRF** **LARRTNSTFN**  
**QVWLR**IRLMS **RTNRPPLSL** **RMIRKMKLPG** **RENKAVVVG** **TVTDDVRIE**  
**VPKLVKCALR** **VSSRARSIL** **KAGGKI**
- Q9IV55 (100%), 22,877.0 Da**  
**Q9IV55\_MOUSE 40S ribosomal protein S5 OS=Mus musculus GN=Rps5 PE=2 SV=1**  
 3 exclusive unique peptides, 3 exclusive unique spectra, 3 total spectra, 23/204 amino acids (16% coverage)

MTWEAATPA **VAETPDIKLF** **GKWSDDQYI** **NDISLDDYIA** **VKEKYAKYLP**  
**HSGRYAAKR** **FRKAGCPINE** **RLTNSMMHG** **RNCKKIMTY** **RIVKHAFEI**  
**HLLTGENPLO** **VLVNAIINSG** **PREDSTRIGR** **ACTVRRDAVD** **VSPLRRVNOA**  
**IWLCTGARE** **AAFNRKITA** **ECLADELINA** **AKGSSNSYAT** **KKKDELERVA**  
**KSNR**
- P41105 (100%), 15,733.7 Da**  
**RL28\_MOUSE 60S ribosomal protein L28 OS=Mus musculus GN=Rpl28 PE=1 SV=2**  
 2 exclusive unique peptides, 2 exclusive unique spectra, 22/137 amino acids (16% coverage)

MSAHLQWVV **RNCSSFLIKR** **NKQTYSTEPN** **NLKNRSFRT** **NGLIHRKTIVG**  
**VEPADGKGV** **VVMKRRSGO** **RKPATSYVRT** **TINKNARL** **SSIRHMIRKN**  
**KYRPDLRMAA** **IRRSAILRS** **QKPVVVKRRK** **TRPTKSS**
- P62264 (100%), 16,272.9 Da**  
**RS14\_MOUSE 40S ribosomal protein S14 OS=Mus musculus GN=Rps14 PE=2 SV=3**  
 2 exclusive unique peptides, 2 exclusive unique spectra, 8 total spectra, 24/151 amino acids (16% coverage)

MAPRKGKKEK **EEOVISLGP**O **VAEENVFGV** **CHIFASFNDT** **FVHVTDLGSK**  
**ETICRVJGGM** **KVKADRESS** **PYAAMLAADD** **VAORCKELGI** **TALHIKRLAT**  
**GNRRTKTPGP** **CAQSALRALA** **RSGMKIGRIE** **DVTPIPSDST** **RRKCGRRGR**  
**L**
- P63325 (100%), 18,916.3 Da**  
**RS10\_MOUSE 40S ribosomal protein S10 OS=Mus musculus GN=Rps10 PE=1 SV=1**  
 2 exclusive unique peptides, 2 exclusive unique spectra, 2 total spectra, 23/165 amino acids (14% coverage)

**MLMPKKNRIA** **IYELLFKEGV** **MVAKKDVHMP** **KHPELADKNV** **PNLHVMMKMO**  
**SLKSRGYVKE** **OFARHFYWF** **LTNEGIOYLR** **DYHLHPEPVI** **PATLRSRPF**  
**TGRPRKQGE** **GEPPARFTRG** **EADROTYSRS** **AVPPGADKKA** **FAGAGSATEF**  
**QFRGGFCGR** **QPPQ**
- P14131 (100%), 16,445.9 Da**  
**RS16\_MOUSE 40S ribosomal protein S16 OS=Mus musculus GN=Rps16 PE=2 SV=4**  
 2 exclusive unique peptides, 2 exclusive unique spectra, 21/146 amino acids (14% coverage)

**MPSKGFLOSV** **DVFGK**KTAT **AVAHCKRNG** **LIKVNGRPLE** **MIEPRTLOYK**  
**LEELVLLGK** **ERFAGYDIR** **RVKGGCHVAD** **IYAIROSISK** **ALVAYYQKYV**  
**DEASKKEIKD** **ILIQYDRTLL** **VADPRRCEK** **KFGCGGARAR** **YQKSYR**
- P62843 (99%), 17,040.8 Da**  
**RS15\_MOUSE 40S ribosomal protein S15 OS=Mus musculus GN=Rps15 PE=2 SV=2**  
 1 exclusive unique peptide, 1 exclusive unique spectra, 19/145 amino acids (13% coverage)

MAEVEOKKR **TFRKFTYRGV** **DLDOLLMSY** **EOLMOLYSAR** **ORRRLNRCLR**  
**RKQHSLLKRL** **RKAKKEAPP**M **EKPEVVKTHL** **RDMLILPENV** **GSMVGVNKG**  
**TFNQVEIKPE** **MIGHYLGFS** **ITYKPVKHR** **PGIGATHSSR** **FIPLK**
- Q88P67 (100%), 17,779.5 Da**  
**RL24\_MOUSE 60S ribosomal protein L24 OS=Mus musculus GN=Rpl24 PE=2 SV=2**  
 2 exclusive unique peptides, 3 exclusive unique spectra, 3 total spectra, 21/157 amino acids (13% coverage)

**MKVELCSFSG** **YKIYPGHRR** **YARTDGVFO** **FLNAKCESAF** **LSKRNPPOIN**  
**WTVLYRRKHK** **KGOSEI**OK **RTRRAVFOR** **AITGASLADI** **MAKRNOKPEV**  
**RKAQREDAIR** **AAEKAKKAKQ** **ASKKTAMAAA** **KAPTKAAPRK** **KIVPKVYSA**  
**PRVGGK**
- Q6ZW27 (100%), 23,397.5 Da**  
**Q6ZW27\_MOUSE 60S ribosomal protein L17 OS=Mus musculus GN=Rpl17 PE=2 SV=1**  
 2 exclusive unique peptides, 2 exclusive unique spectra, 5 total spectra, 19/184 amino acids (10% coverage)

**MVRYSLDPEN** **PTK**SCKSRGS **NLRVHFKNTR** **ETAOAIKGMH** **IRKATKYLLD**  
**VTLKCKCVP** **RRYNGCVGR** **ADAKQWGWTO** **RAWRPKSAEF** **LLHMLNAES**  
**NAELGLDVD** **SLVIEHIOVN** **KAPKMRRTY** **GRHRINPVM** **SSPCHIEML**  
**TEKEQIVPKP** **EVEVAQKKI** **SQKLLKQKQL** **MARE**
- P62267 (99%), 15,807.7 Da**  
**RS23\_MOUSE 40S ribosomal protein S23 OS=Mus musculus GN=Rps23 PE=2 SV=3**  
 1 exclusive unique peptide, 1 exclusive unique spectra, 1 total spectra, 11/143 amino acids (8% coverage)

**MGKRCGLRTA** **RKLRSHRDO** **KWHDQYKKA** **HLGTALKANP** **FGGSHAKGI**  
**VLEKVGVEAK** **OPNSAIRKCV** **RVOLIKNGKK** **ITAFVPPNCK** **LNFIENDEV**  
**LVACFGRKGG** **AVGDIPGVRF** **KVVKVANVSL** **LALYKGGKER** **PRS**



## Figure legends

**Figure A. Quantification of RP transcript relative expression in murine HBs.** (A) Differential abundance of RP transcripts between WT hepatocytes and WT HBs. Data are derived from the RNA-seq results shown in Fig 1A. Actual fractional abundance is shown with the total adding to 100%. Asterisks indicate those transcripts in HBs whose abundance relative to that of the same transcript in hepatocytes differs ( $q$ -value  $<0.05$  after FDR-adjustment). Error bars indicate one standard deviation. (B) The same representation as shown in (A) for KO hepatocytes and HBs.

**Figure B. Quantification of RP transcript relative expression over the course of HCC induction, regression and recurrence.** Data are presented as described in Figure A. Each time point is compared to normal liver results. (Asterisks indicate  $p < 0.05$  after FDR-adjustment).

**Figure C. Additional immuno-blots of RPs from representative tissue samples over the course of HCC induction, regression and recurrence.** Blots were performed as described for Fig 1F. Three additional groups are shown here.

**Figure D. 3D Area Plot depicting RP transcript deregulation in human HCCs.** The data shown include the matched HCC samples depicted in Fig 3A as well as 323 additional unmatched samples. F-tests were performed comparing variance in relative expression for each RP transcript across the normal matched liver samples and the HCC tumors in order to determine if the variability in RP transcript expression was significantly different across tumors compared

to normal liver. F-tests were significant for 69 of 77 RPs after FDR adjustment. The RP genes Rps26, Rpl9, Rps27, Rps28, and Rpl21, with the lowest expression and greatest variability (without significant F-tests), were excluded from the graph in order to appreciate differences in the other transcripts.

**Figure E. 3D Area Plot depicting RP transcript deregulation in human CRCs.** Data are presented as described in Figure D and include the matched tumor samples shown in Fig 3B. F-tests were significant in 48 of 77 RPs, and the same five transcripts were excluded from the graph.

**Figure F. 3D Area Plot depicting RP transcript deregulation in human breast cancers.** Data are presented as described in Figure D and include the matched tumor samples shown in Fig 3C. F-tests were significant in 71 of 77 RPs, and the same five transcripts were excluded from the graph.

**Figure G. 3D Area Plot depicting RP transcript deregulation in human prostate cancers.** Data are presented as described in Figure D and include the matched tumor samples shown in Fig 3D. F-tests were significant in 23 of 77 RPs, and the same five transcripts were excluded from the graph.

**Figure H. The relationship between ribosomal stress and the p19<sup>ARF</sup>/Mdm2/ p53 pathway.** The complex and highly regulated process of ribosomal biogenesis [21, 22, 26] can be disrupted

by RP haplo-insufficiency, leading to ribosomal stress [1, 2, 4]. In response, p19<sup>ARF</sup> is induced and inhibits further ribosomal biogenesis by blocking the nucleolar export of 40S and 60S ribosomal subunits [3, 8, 55]. Independently, p19<sup>ARF</sup> can inhibit Mdm2 and thus prevent the latter protein's binding to and promoting the ubiquitin-mediated degradation of p53 [30]. A subset of free RPs can also bind the p53-recognition domain of Mdm2 and prevent or disrupt the Mdm2-p53 interaction [32]. Additionally, at least one RP, namely RPS26, has recently been shown to interact directly with p53 and supplement its transcriptional activity [33].

**Figure I. Immuno-blotting for p19<sup>ARF</sup>, Mdm2 and p53 in additional HCCs.** Studies were performed as described in Fig 5B.

**Figure J. Mdm2-interacting RPs identified in HCCs.** (A) p53 and Mdm2 co-localize to HCC cytoplasm. A freshly collected HCC tumor was fractionated into cytoplasmic, nuclear and nucleolar compartments. Each fraction was tested for the protein markers localizing to these compartments (GAPDH, histone H3 and fibrillarin, respectively) and in parallel for p53, p19<sup>ARF</sup> and Mdm2. Varying amounts of lysate and exposure times were required to compensate for differential expression of the proteins. (B) Liver and HCC cytoplasmic fractions were immunoprecipitated with control IgG or anti-Mdm2 IgG. Precipitates were resolved by SDS-PAGE and silver stained. Bracketed regions were excised from HCC MDM2-IP lane and subjected to tryptic digestion and mass spectrometry. (C) A Venn diagram showing the comparison of RPs detected in MDM2-IPs between liver, HBs and HCCs. Eight Mdm2-interacting RPs were common with HB while an additional nine were unique to HCCs shown also in Table E and Figures O and P.

**Figure K. Mdm2-interacting RP peptides identified by in HB cytoplasmic lysates following anti-Mdm2 IP (~24-35 kDa range).** HB cytoplasmic extracts were immuno-precipitated with agarose-linked anti-Mdm2 antibody. After release of the Mdm2-interacting proteins and resolution by SDS-PAGE, the silver-stained region of the gel corresponding to the ca. 24-35 kDa region of lane 4 (Fig 5E, red bracket) was excised and subjected to tryptic digestion and mass spectrometric analysis as described in Materials and methods. Peptides identified in the analysis are highlighted in yellow on their corresponding full-length RP. The coverage for each RP ranged from 10-64%. Each of the 12 RPs listed here is also listed in S2 Table.

**Figure L. Mdm2-interacting RP peptides identified by MS in liver cytoplasmic lysates following anti-Mdm2 IP (~24-35 kDa range).** An analysis identical to that described in S3 Table was performed the portion of the gel denoted by the red band depicted in Fig 5E. The coverage for each RP ranged from 7-39%. Each of the 7 RPs listed here is also listed in Table B.

**Figure M. Mdm2-interacting RP peptides identified by MS in HB cytoplasmic lysates following anti-Mdm2 IP (~14-24 kDa range).** Tryptic peptides corresponding to the indicated 17 RPs in the ~14-24 kDa range identified by mass spectrometry lane 4, Fig 5E (blue bracket) and listed in Table D. Each identified peptide is indicated by yellow highlighting and is mapped to its corresponding region in the sequence of the full-length RP. The coverage for each RP ranged from 13-59%.

**Figure N. Mdm2-interacting RP peptides identified in liver cytoplasmic lysates following anti-Mdm2 IP (~14-24 kDa range).** Tryptic peptides corresponding to the indicated 11 RPs in the ~14-24 kDa range identified by mass spectrometry (Fig 4E, lane 2, blue bracket) and listed in Table D are indicated by yellow highlighting and is mapped to its corresponding region in the sequence of the full-length RP. The coverage for each RP ranged from 12-38%.

**Figure O. Mdm2-interacting RPs identified by MS in HCC cytoplasmic lysates following anti-MDM2-IP (~24-35 kDa range).** HCC cytoplasmic extracts were immuno-precipitated with agarose-linked anti-Mdm2 antibody. After release of the Mdm2-interacting proteins and resolution by SDS-PAGE, the silver-stained region of the gel corresponding to the ca. 24-35 kDa region of HCC MDM2-IP lane (Figure J, red bracket) was excised and subjected to tryptic digestion and mass spectrometric analysis as described in Materials and methods. Peptides identified in the analysis are highlighted in yellow on their corresponding RP. The coverage for each RP ranged from 7-56%. Each of the 10 RPs listed here is also listed in Table E.

**Figure P. Mdm2-interacting RP peptides identified by MS in HCC cytoplasmic lysates following anti-Mdm2 IP (~14-24 kDa range).** Tryptic peptides corresponding to the indicated 24 RPs in the ~14-24 kDa range as identified by mass spectrometry from MDM2-IP lane, Figure J (blue bracket) are listed in Table E. Each identified peptide is indicated by yellow highlighting and is mapped to its corresponding region in the sequence of the full-length RP. The coverage for each RP ranged from 8-39%.

## Tables

**Table A**

| <b>Antibody</b>             | <b>Species</b> | <b>Vendor and catalog No.</b>     | <b>Dilution used</b> |
|-----------------------------|----------------|-----------------------------------|----------------------|
| RPS10                       | Rabbit         | GeneTex (GTX101836)               | 1:1000               |
| RPS19                       | Rabbit         | GeneTex (GTX54725)                | 1:1000               |
| RPS24                       | Rabbit         | GeneTex (GTX47408)                | 1:1000               |
| RPS26                       | Rabbit         | Proteintech (14909-1-AP)          | 1:1000               |
| RPS27                       | Goat           | OriGene (TA302828)                | 1:1000               |
| RPL5                        | Rabbit         | GeneTex (GTX101821)               | 1:1000               |
| RPL11                       | Rabbit         | Abcam (79352)                     | 1:1000               |
| RPL26                       | Rabbit         | Bethyl Laboratories (A300-685A-T) | 1:1000               |
| RPL30                       | Rabbit         | GeneTex (GTX87885)                | 1:500                |
| BCL-2                       | Rabbit         | Cell Signaling (28700)            | 1:300                |
| GAPDH                       | Mouse          | Sigma-Aldrich (G8795)             | 1:20,000             |
| HRP anti-mouse              | Horse          | Cell Signaling (7076)             | 1:10,000             |
| HRP anti-rabbit             | Goat           | Cell Signaling (7074)             | 1:5000               |
| Alexa Fluor 488 anti-rabbit | Goat           | Thermo Fisher (A-11008)           | 1:1000               |
| AC-Histone H3               | Rabbit         | Santa Cruz (SC8655-R)             | 1:500                |
| Fibrillarin                 | Rabbit         | Cell Signaling (2639)             | 1:1000               |
| p19 ARF                     | Rabbit         | Santa Cruz (SC22784)              | 1:500                |
| MDM2                        | Mouse          | Santa Cruz (SC965)                | 1:1000               |
| P53                         | Mouse          | Calbiochem(OP03)                  | 1:1000               |
| Mdm2 (for immunostain)      | Rabbit         | Abcam (Ab38618)                   | 1:200                |
| P53 (for immunostain)       | Goat           | Santa Cruz, (SC6243-G)            | 1:50                 |
| BAX                         | Rabbit         | Cell signaling (2772)             | 1:1000               |
| Caspase-2                   | Mouse          | Santa Cruz (SC514472)             | 1:500                |

**Table B**

| <b>Gene</b>   | <b>Cohorts</b>   | <b>Average Expression Difference<br/>vs. Normal Tissues</b> |
|---------------|------------------|-------------------------------------------------------------|
| <i>Rpl36a</i> | HCC, BC, CRC, PC | 131.40%                                                     |
| <i>Rpl28</i>  | HCC, BC, PC      | 40.24%                                                      |
| <i>Rps21</i>  | HCC, BC, CRC, PC | 33.41%                                                      |
| <i>Rpl8</i>   | HCC, BC, CRC, PC | 33.17%                                                      |
| <i>Rpl30</i>  | HCC, BC, CRC     | 28.20%                                                      |
| <i>Rps2</i>   | HCC, BC, CRC, PC | 27.62%                                                      |
| <i>Rpl39</i>  | HCC, CRC, PC     | 26.04%                                                      |
| <i>Rpl36</i>  | BC, CRC, PC      | 21.94%                                                      |
| <i>Rps19</i>  | HCC, BC, CRC, PC | 21.94%                                                      |
| <i>Rpl38</i>  | HCC, BC, CRC, PC | 18.37%                                                      |
| <i>Rplp0</i>  | HCC, BC, PC      | 12.76%                                                      |
| <i>Rpl23</i>  | HCC, BC, CRC, PC | 11.15%                                                      |
| <i>Rps16</i>  | HCC, BC, PC      | 10.97%                                                      |
| <i>Rpl23a</i> | HCC, BC, PC      | 10.16%                                                      |
| <i>Rps10</i>  | HCC, BC, PC      | 9.02%                                                       |
| <i>Rpl37</i>  | HCC, BC, CRC, PC | 8.95%                                                       |
| <i>Rps7</i>   | HCC, CRC, PC     | 8.94%                                                       |
| <i>Rps24</i>  | BC, CRC, PC      | 7.13%                                                       |
| <i>Rpl35a</i> | HCC, CRC, PC     | 4.30%                                                       |
| <i>Rps4x</i>  | BC, CRC, PC      | -4.03%                                                      |
| <i>Rpl4</i>   | HCC, BC, PC      | -6.45%                                                      |
| <i>Rps12</i>  | BC, CRC, PC      | -7.42%                                                      |
| <i>Rps6</i>   | HCC, BC, PC      | -9.45%                                                      |
| <i>Rpl17</i>  | BC, CRC, PC      | -9.99%                                                      |
| <i>Rps14</i>  | BC, CRC, PC      | -11.06%                                                     |
| <i>Rps23</i>  | BC, CRC, PC      | -11.19%                                                     |
| <i>Rpl10a</i> | BC, CRC, PC      | -11.63%                                                     |
| <i>Rps13</i>  | HCC, BC, CRC     | -13.55%                                                     |
| <i>Rpl3</i>   | HCC, BC, CRC, PC | -15.68%                                                     |
| <i>Rps25</i>  | HCC, BC, CRC     | -16.42%                                                     |
| <i>Rpl15</i>  | HCC, BC, CRC, PC | -16.58%                                                     |
| <i>Rpl22</i>  | HCC, BC, CRC, PC | -17.31%                                                     |
| <i>Rps3a</i>  | HCC, BC, CRC, PC | -17.42%                                                     |
| <i>Rpl5</i>   | BC, CRC, PC      | -18.57%                                                     |
| <i>Rpl11</i>  | HCC, BC, CRC     | -18.72%                                                     |
| <i>Rpl34</i>  | HCC, BC, CRC     | -21.37%                                                     |
| <i>Rpl26</i>  | HCC, BC, CRC     | -23.71%                                                     |

**Table C**

| <b>HB cytoplasmic extract</b> |         | <b>Normal liver cytoplasmic extract</b> |        |
|-------------------------------|---------|-----------------------------------------|--------|
| RPL7                          | 31 kDa* | ND                                      |        |
| RPL8                          | 28 kDa  | RPL8                                    | 28 kDa |
| RPL10A                        | 25 kDa* | ND                                      |        |
| RPL13                         | 24 kDa  | RPL13                                   | 24 kDa |
| RPL14                         | 24 kDa* | ND                                      |        |
| RPS2                          | 31 kDa* | ND                                      |        |
| RPS3                          | 27 kDa  | RPS3                                    | 27 kDa |
| RPS3A                         | 30 kDa  | RPS3A                                   | 30 kDa |
| RPS4X                         | 30 kDa  | RPS4X                                   | 30 kDa |
| RPS6                          | 29 kDa  | RPS6                                    | 29 kDa |
| RPS8                          | 24 kDa  | RPS8                                    | 24 kDa |
| RPSA                          | 33 kDa* | ND                                      |        |

\*Detected only in HB

ND = not detected



**Table D**

| HB cytoplasmic extract |         | Normal liver cytoplasmic extract |                     |
|------------------------|---------|----------------------------------|---------------------|
| RPL11                  | 20 kDa  | RPL11                            | 20 kDa              |
| RPL12                  | 18 kDa  | RPL12                            | 18 kDa              |
| RPL13                  | 24 kDa* | ND                               |                     |
| RPL23A                 | 18 kDa* | ND                               |                     |
| RPL24                  | 18 kDa  | RPL24                            | 15 kDa              |
| RPL26                  | 17 kDa  | RPL26                            | 17 kDa              |
| RPL27A                 | 17 kDa  | RPL27A                           | 17 kDa              |
| RPL28                  | 16 kDa* | ND                               |                     |
| RPL32                  | 16 kDa  | RPL32                            | 16 kDa              |
| RPL35                  | 15 kDa* | ND                               |                     |
| RPS10                  | 19 kDa  | RPS10                            | 19 kDa              |
| RPS11                  | 18 kDa  | RPS11                            | 18 kDa              |
| RPS13                  | 17 kDa  | RPS13                            | 17 kDa              |
| RPS15                  | 17 kDa* | ND                               |                     |
| RPS17                  | 16 kDa* | ND                               |                     |
| RPS24                  | 15 kDa* | ND                               |                     |
| RPS25                  | 14 kDa  | RPS25                            | 14 kDa              |
| ND                     |         | RPS18                            | 18 kDa <sup>+</sup> |

\*Detected only in HB

<sup>+</sup>Detected only in normal liver

ND = not detected

**Table E**

| HCC-D (~24-35 kDa) |         | HCC-E (~14-24 kDa) |                    |
|--------------------|---------|--------------------|--------------------|
|                    |         | RPL13              | 24 kDa             |
|                    |         | RPS9               | 23 kDa*            |
|                    |         | RPL26              | 12 kDa (FRAGMENT)  |
|                    |         | RPS14              | 16 kDa*            |
|                    |         | RPL12              | 18 kDa             |
|                    |         | RPS13              | 17 kDa             |
|                    |         | RPL31              | 14 kDa*            |
| RPS3               | 27 kDa  | RPL23A             | 18 kDa*            |
| RPS3A              | 30 kDa  | RPS17              | 16 kDa*            |
| RPS4X              | 30 kDa  | RPL11              | 20 kDa             |
| RPL13              | 24 kDa  | RPS11              | 18 kDa             |
| RPS8               | 24 kDa  | RPS25              | 14 kDa*            |
| RPS6               | 29 kDa  | RPS24              | 15 kDa*            |
| RPS2               | 31 kDa* | RPL18A             | 21 kDa*            |
| RPL8               | 28 kDa  | RPL28              | 16 kDa*            |
| RPL14              | 24 kDa* | RPS5               | 23 kDa*            |
| RPL10A             | 25 kDa* | RPL32              | 16 kDa             |
|                    |         | RPL18              | 15 kDa (FRAGMENT)* |
|                    |         | RPL24              | 18 kDa             |
|                    |         | RPS16              | 16 kDa*            |
|                    |         | RPS10              | 19 kDa             |
|                    |         | RPS23              | 16 kDa*            |
|                    |         | RPS15              | 17 kDa*            |
|                    |         | RPL17              | 21 kDa*            |

\*Present only in HCC when compared to normal liver

**Table F**

| <b>Gene</b>   | <b>HCC</b>        | <b>CRC</b>             | <b>BC</b>                              | <b>PC</b>     |
|---------------|-------------------|------------------------|----------------------------------------|---------------|
| <i>RpsA</i>   |                   | Q261R                  |                                        |               |
| <i>Rps2</i>   | V209A             | Splice region          | F84L                                   |               |
| <i>Rps3</i>   | Q4R (2)           | A71D, G15R             |                                        |               |
| <i>Rps3a</i>  | D196Tfs*2, V22A   |                        |                                        |               |
| <i>Rps4x</i>  |                   | Y54C, V207M            | I102M, N224H                           |               |
| <i>Rps4y1</i> | Y149Sfs*9         |                        |                                        |               |
| <i>Rps5</i>   |                   |                        | E98K, E3K, V113L, F20L,<br>V11G, T126A | R130H         |
| <i>Rps6</i>   | L133P, K221Lfs*26 |                        | S236C, S139N, K93N, M1?                | R232H         |
| <i>Rps7</i>   | I60V              |                        |                                        |               |
| <i>Rps8</i>   |                   |                        | C71W                                   |               |
| <i>Rps9</i>   | R54Afs*8          | R79W, R83H, I32I       |                                        | R133P         |
| <i>Rps11</i>  |                   | G53Afs*24              |                                        | R139S, K32T   |
| <i>Rps12</i>  |                   |                        | E87K                                   |               |
| <i>Rps13</i>  | P7S               | I37M                   |                                        |               |
| <i>Rps15a</i> |                   | N91K                   |                                        |               |
| <i>Rps16</i>  |                   | R62X, R69L             | L47V                                   |               |
| <i>Rps18</i>  |                   | F9S, T145A             | I117N                                  |               |
| <i>Rps20</i>  |                   | R79C                   |                                        | A16T          |
| <i>Rps23</i>  | V55Sfs*4          | G33D, G78D, N39T, V85L |                                        |               |
| <i>Rps24</i>  | T38A              |                        |                                        |               |
| <i>Rps25</i>  |                   |                        | A87G                                   |               |
| <i>Rps27</i>  | D6N               |                        | Splice region                          |               |
| <i>Rps27a</i> | L56Cfs*16         |                        |                                        | K83del, Y106C |
| <i>Rps29</i>  |                   |                        | S20F                                   |               |
| <i>Fau</i>    | N132Y, V86del     | Y112C                  |                                        |               |

**Table G**

| Gene          | HCC                     | CRC                      | BC                           | PC                          |
|---------------|-------------------------|--------------------------|------------------------------|-----------------------------|
| <i>Rpl3</i>   | R174H, G225D, A359S     | K124T, T346A             | V338G, V85G                  | K128del                     |
| <i>Rpl4</i>   | Splice region           | E13K, R97C               | D179H                        |                             |
| <i>Rpl5</i>   | D59E                    | K258N                    | N57Efs*12, A97G              | N94D, G156del, A77T         |
| <i>Rpl6</i>   |                         | F193C (2), T213I         |                              | T148N, N101S                |
| <i>Rpl7</i>   |                         | R22Q                     | V4G                          | V14G, E188Q                 |
| <i>Rpl7a</i>  | R196G, R59H, R89L       |                          |                              | P58S                        |
| <i>Rpl8</i>   | I158F                   |                          | I112Qfs*38, A27V             | R3H                         |
| <i>Rpl9</i>   | R125M                   | I151T, R115Q, R89H, N42D | L176V                        |                             |
| <i>Rpl10</i>  |                         | L103S                    | I97M, I70L                   | A155T                       |
| <i>Rpl10a</i> | K98Q, R7G               | P135Lfs*17, A166V        |                              | L138F, E88*, E178K          |
| <i>Rpl11</i>  | R146C, T148A, G86C      | F166L                    |                              | L15F, K8Rfs*26, Y131C, C72R |
| <i>Rpl12</i>  |                         |                          | V42Lfs*15                    | R117W                       |
| <i>Rpl13</i>  | R183C, Q111*            |                          |                              |                             |
| <i>Rpl13a</i> |                         |                          | T132I, N65K, R37G, V203L     |                             |
| <i>Rpl15</i>  |                         |                          | R189Gfs*18, S187Ffs*29       |                             |
| <i>Rpl18</i>  | L27M                    |                          | G118V                        |                             |
| <i>Rpl18a</i> | R116Gfs*12, Q144L, V62F | R43C                     | R83H, R95Q, R43Pfs*10, R166C |                             |
| <i>Rpl19</i>  | R16C                    | A159V                    | R107K, E28K                  | K21del, R151H               |
| <i>Rpl21</i>  | I93L                    | F15L                     |                              |                             |
| <i>Rpl22</i>  | C25*                    | K89Nfs*3, K15Rfs*5       | K15Rfs*5 (4)                 |                             |
| <i>Rpl23</i>  | K75Rfs*31               |                          | E99Q                         |                             |
| <i>Rpl23a</i> | I76V                    |                          |                              |                             |
| <i>Rpl24</i>  |                         | P133H                    | R105Q                        |                             |
| <i>Rpl26</i>  |                         |                          | R50Q                         |                             |
| <i>Rpl27</i>  | R21H                    |                          |                              |                             |
| <i>Rpl27a</i> | K7R                     |                          |                              |                             |
| <i>Rpl28</i>  | V78M                    | D105N, P53S              |                              | K65M                        |
| <i>Rpl29</i>  |                         |                          |                              | R44C                        |
| <i>Rpl31</i>  |                         | Splice region, E94V      | R85H                         |                             |
| <i>Rpl32</i>  |                         | R27Q                     | F20L                         |                             |
| <i>Rpl34</i>  |                         |                          |                              | A16T                        |
| <i>Rpl35</i>  |                         | R84Q                     | K79N                         |                             |
| <i>Rpl35a</i> | Y14C                    |                          |                              | V33I                        |
| <i>Rpl36</i>  |                         |                          | I81M                         |                             |
| <i>Rpl36a</i> | A60Gfs*2                |                          | R57Q                         |                             |
| <i>Rpl37</i>  | N13S                    |                          |                              | A51G                        |
| <i>Rpl37a</i> |                         |                          | K62dup                       |                             |
| <i>Rpl39</i>  |                         | R21C                     |                              |                             |
| <i>Rpl41</i>  |                         |                          | R21T                         |                             |
| <i>Rplp0</i>  | P272Lfs*63              | V121A, F316del           | A278G (2), A262T, E299K      |                             |
| <i>Rplp1</i>  |                         |                          |                              | 150V                        |
| <i>Rplp2</i>  |                         |                          | E92Q                         |                             |
| <i>Uba52</i>  | Q62*                    | M94T, L71S               | H104Y, N90Y                  |                             |

**Table H**

| <b>Gene Symbol</b> | <b>Number of Non-RP-Mutant Tumors with Mutation (Total = 192)</b> | <b>Number of RP-Mutant Tumors with Mutation (Total = 31)</b> | <b>P-value</b>         |
|--------------------|-------------------------------------------------------------------|--------------------------------------------------------------|------------------------|
| <i>TTN</i>         | 62                                                                | 22                                                           | $4.55 \times 10^{-15}$ |
| <i>RYR2</i>        | 13                                                                | 17                                                           | $2.14 \times 10^{-9}$  |
| <i>MUC16</i>       | 23                                                                | 15                                                           | $1.59 \times 10^{-7}$  |
| <i>LRP1B</i>       | 23                                                                | 15                                                           | $1.59 \times 10^{-7}$  |
| <i>FAT4</i>        | 25                                                                | 15                                                           | $1.59 \times 10^{-7}$  |
| <i>NEB</i>         | 5                                                                 | 14                                                           | $1.14 \times 10^{-6}$  |
| <i>DNAH10</i>      | 8                                                                 | 14                                                           | $1.14 \times 10^{-6}$  |
| <i>CSMD2</i>       | 10                                                                | 14                                                           | $1.14 \times 10^{-6}$  |
| <i>LRP2</i>        | 21                                                                | 14                                                           | $1.14 \times 10^{-6}$  |
| <i>SYNE1</i>       | 35                                                                | 14                                                           | $1.14 \times 10^{-6}$  |
| <i>USH2A</i>       | 14                                                                | 13                                                           | $7.18 \times 10^{-6}$  |
| <i>CSMD3</i>       | 15                                                                | 13                                                           | $7.18 \times 10^{-6}$  |
| <i>HMCN1</i>       | 17                                                                | 13                                                           | $7.18 \times 10^{-6}$  |
| <i>PIK3CA</i>      | 32                                                                | 13                                                           | $7.18 \times 10^{-6}$  |
| <i>ATR</i>         | 5                                                                 | 12                                                           | $4.02 \times 10^{-5}$  |
| <i>DNAH11</i>      | 6                                                                 | 12                                                           | $4.02 \times 10^{-5}$  |
| <i>DOCK2</i>       | 9                                                                 | 12                                                           | $4.02 \times 10^{-5}$  |
| <i>RYR3</i>        | 11                                                                | 12                                                           | $4.02 \times 10^{-5}$  |
| <i>ACVR2A</i>      | 13                                                                | 12                                                           | $4.02 \times 10^{-5}$  |
| <i>CSMD1</i>       | 15                                                                | 12                                                           | $4.02 \times 10^{-5}$  |
| <i>FAT2</i>        | 17                                                                | 12                                                           | $4.02 \times 10^{-5}$  |
| <i>DNAH5</i>       | 22                                                                | 12                                                           | $4.02 \times 10^{-5}$  |
| <i>ARAP2</i>       | 2                                                                 | 11                                                           | $1.99 \times 10^{-4}$  |
| <i>CHD6</i>        | 3                                                                 | 11                                                           | $1.99 \times 10^{-4}$  |
| <i>PAPPA2</i>      | 3                                                                 | 11                                                           | $1.99 \times 10^{-4}$  |
| <i>PKHD1L1</i>     | 4                                                                 | 11                                                           | $1.99 \times 10^{-4}$  |
| <i>ZNF292</i>      | 5                                                                 | 11                                                           | $1.99 \times 10^{-4}$  |
| <i>KIAA1109</i>    | 5                                                                 | 11                                                           | $1.99 \times 10^{-4}$  |
| <i>FBN1</i>        | 6                                                                 | 11                                                           | $1.99 \times 10^{-4}$  |
| <i>LAMA2</i>       | 6                                                                 | 11                                                           | $1.99 \times 10^{-4}$  |
| <i>MAP1B</i>       | 7                                                                 | 11                                                           | $1.99 \times 10^{-4}$  |
| <i>DST</i>         | 8                                                                 | 11                                                           | $1.99 \times 10^{-4}$  |
| <i>DNAH8</i>       | 8                                                                 | 11                                                           | $1.99 \times 10^{-4}$  |
| <i>ANK3</i>        | 8                                                                 | 11                                                           | $1.99 \times 10^{-4}$  |
| <i>PCDH15</i>      | 9                                                                 | 11                                                           | $1.99 \times 10^{-4}$  |
| <i>PCLO</i>        | 9                                                                 | 11                                                           | $1.99 \times 10^{-4}$  |
| <i>PDZD2</i>       | 9                                                                 | 11                                                           | $1.99 \times 10^{-4}$  |
| <i>MYH11</i>       | 10                                                                | 11                                                           | $1.99 \times 10^{-4}$  |
| <i>MACF1</i>       | 11                                                                | 11                                                           | $1.99 \times 10^{-4}$  |
| <i>RYR1</i>        | 13                                                                | 11                                                           | $1.99 \times 10^{-4}$  |
| <i>DMD</i>         | 20                                                                | 11                                                           | $1.99 \times 10^{-4}$  |

## **Table legends.**

**Table A. Antibodies utilized in the current study.**

**Table B. Shared RP transcript deregulation across human cancers.** Listed are RP transcripts which showed significantly different relative expression in tumors compared to normal tissues, as well as shared directionality in at least 2 of the 4 cancer cohorts examined. BC = breast cancer, HCC = hepatocellular carcinoma, CRC = colorectal carcinoma, PC = prostate cancer. For each RP transcript, relative percent expression was compared between tumor (all matched and unmatched samples) and average relative expression in normal tissue with a two-sided t-test ( $P < 0.05$ ). All P-values were then adjusted based on a false-discovery rate of 5%. Percent difference in relative expression for a given transcript was then calculated by dividing the difference in average relative expression between HCC and normal tissue by the average relative expression in normal tissue. Transcripts were defined as having shared directionality when differences in relative percent expression were either all increased or decreased relative to normal tissues. Transcripts with significantly different relative percent expression in 2 or more cancers but without shared directionality were excluded.

**Table C. Mdm2-interacting RPs identified in HB and normal liver cytoplasm (~24-35 kDa range).** Note that all seven of the RPs associated with Mdm2 in normal liver cytoplasmic lysates were also identified in IPs from HB cytoplasmic lysates. See Figure K and Figure L for the identities of all detected peptides. Among the non-RPs identified by mass spectrometry in this analysis were five isoforms of the 14-3-3 family which have been previously identified as Mdm2 partners (56-60).

**Table D. Mdm2-interacting RPs identified in HB and normal liver cytoplasmic lysates following anti-Mdm2 IP (~14-24 kDa range; blue bracket in Fig 5E).** Note that 10 of 11 proteins identified as Mdm2 binding partners in normal liver were also identified in IPs from HBs, which contained seven additional RPs. See Figure M and Figure N for the exact mapping of each identified peptide to its corresponding RP.

**Table E. Mdm2-interacting RPs identified in HCC cytoplasmic lysates following anti-Mdm2 IP.** See Figure O and Figure P for the exact mapping of each identified peptide to its corresponding RP.

**Table F. Mutations in RP small subunit genes identified in four investigated TCGA cancer cohorts, designated with standard HGVS nomenclature.**

**Table G. Mutations in RP large subunit genes identified in four investigated TCGA cancer cohorts, designated with standard HGVS nomenclature.**

**Table H. Mutations associated with ribosomal protein mutations in human colorectal cancers.** The listed genes are more frequently co-mutated in tumors possessing a ribosomal protein mutation than would be expected by chance alone. P-values were calculated using cumulative binomial distributions and are significant after correction for false discovery.
